# Supplementary material for: Phenylacetyl-/Trolox- Amides: Synthesis, Sigma-1, HDAC-6, and Antioxidant Activities
Source: MDPI journal article supplement (doi:10.3390/ijms242015295), 2023-10-18

ORAC Standard Curves [averaged slopes ( $n=3$  runs) are reported in **table 5** and illustrated in **figure 4**] of the manuscript.

- Trolox Standard Curves.

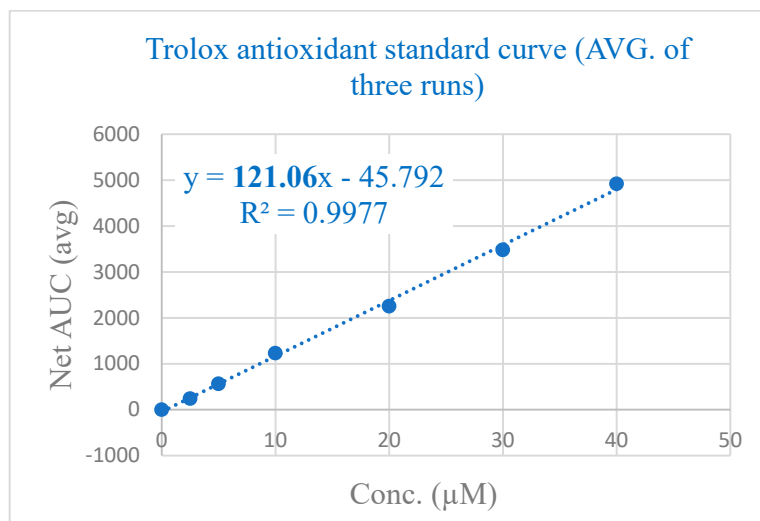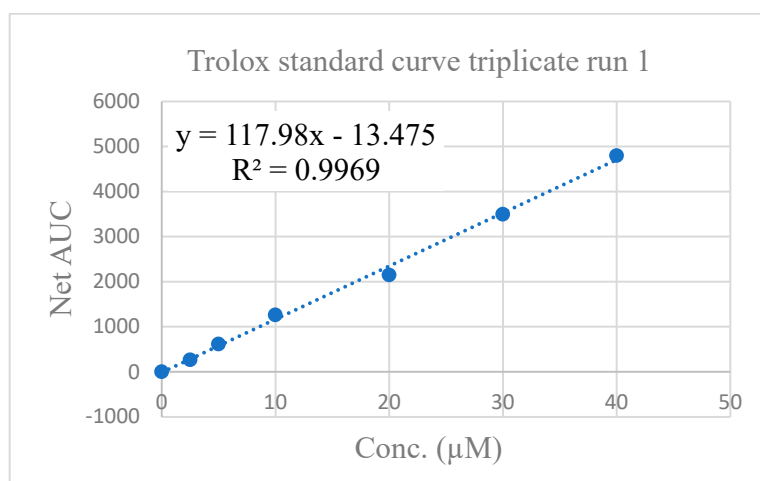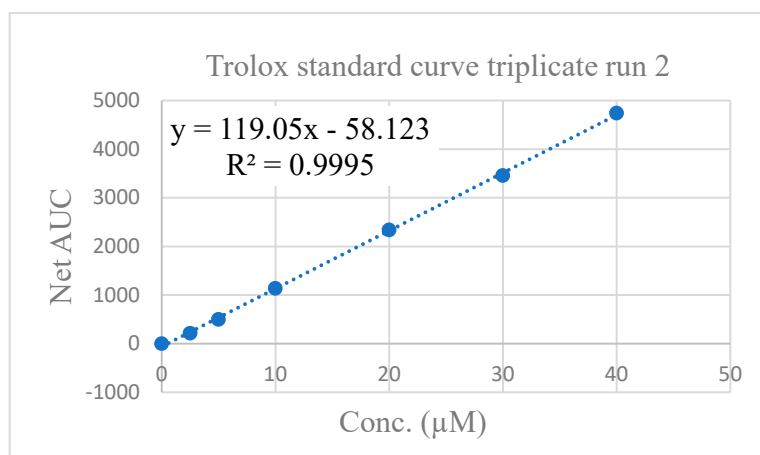

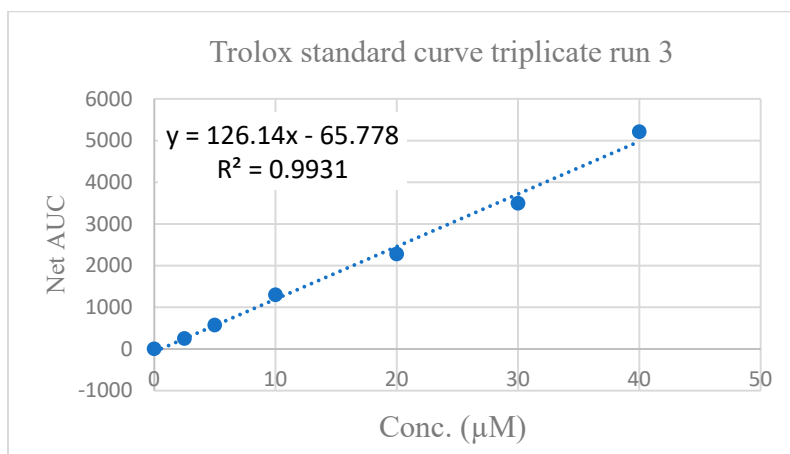

- Test Compounds (3, 4, 8, 12, 18, 20) Standard Curves.

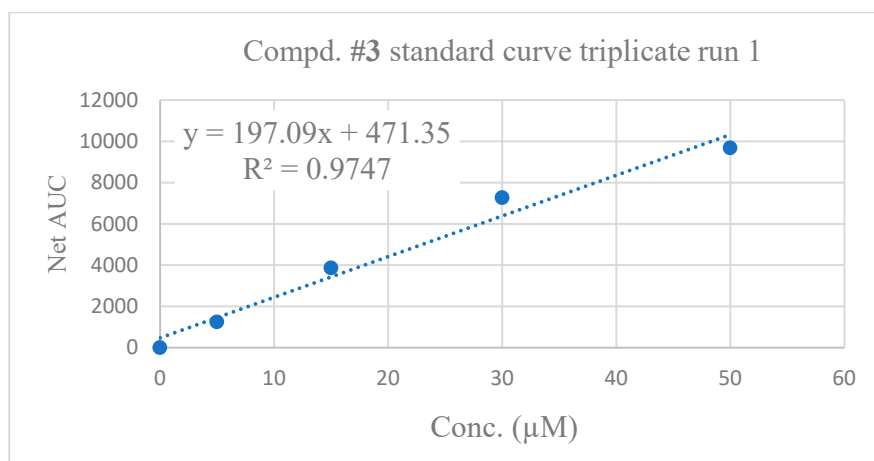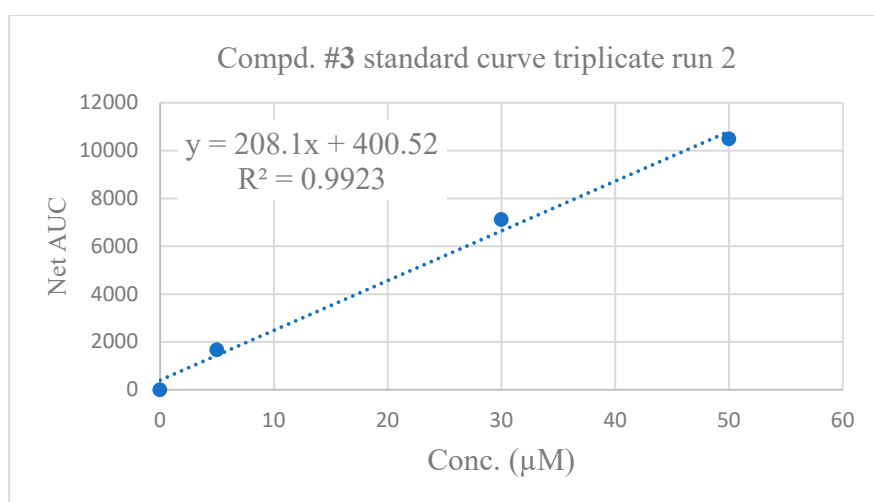

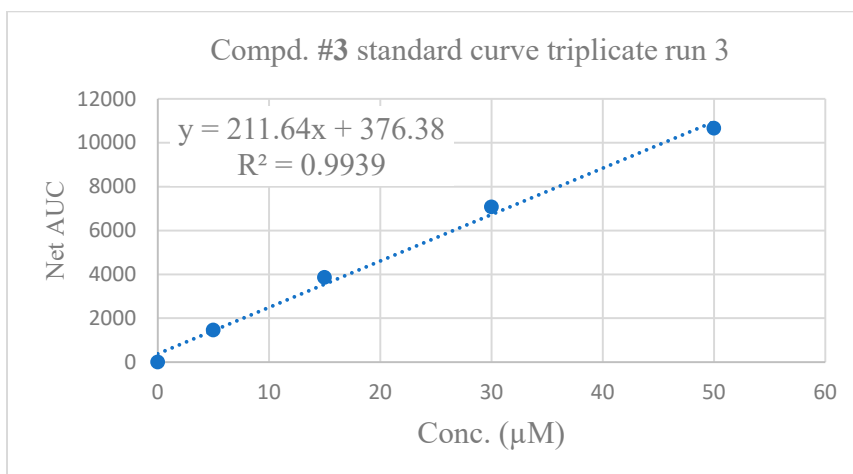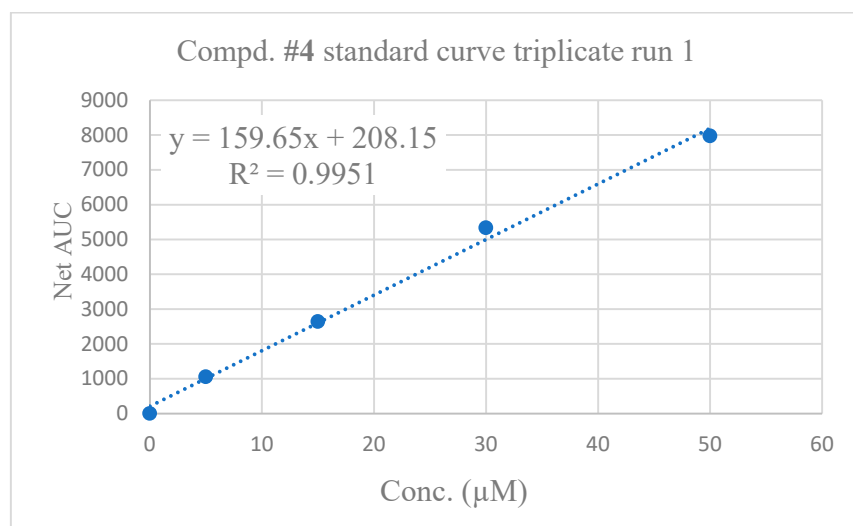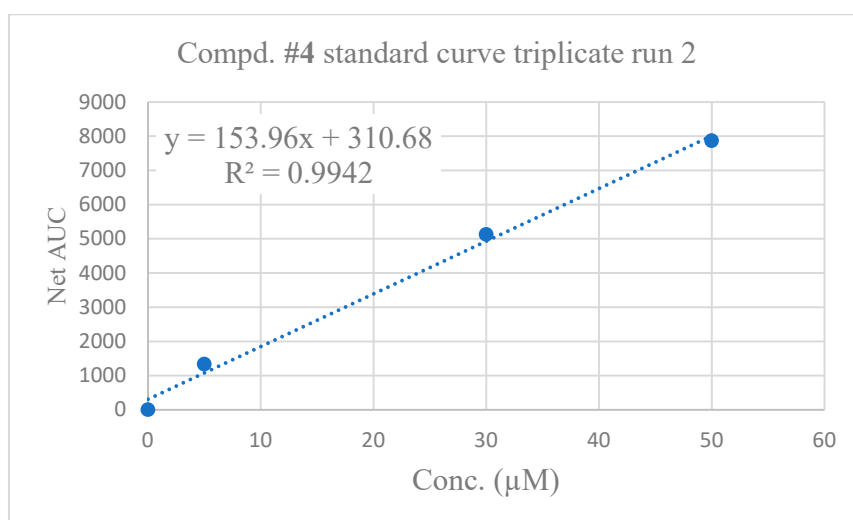

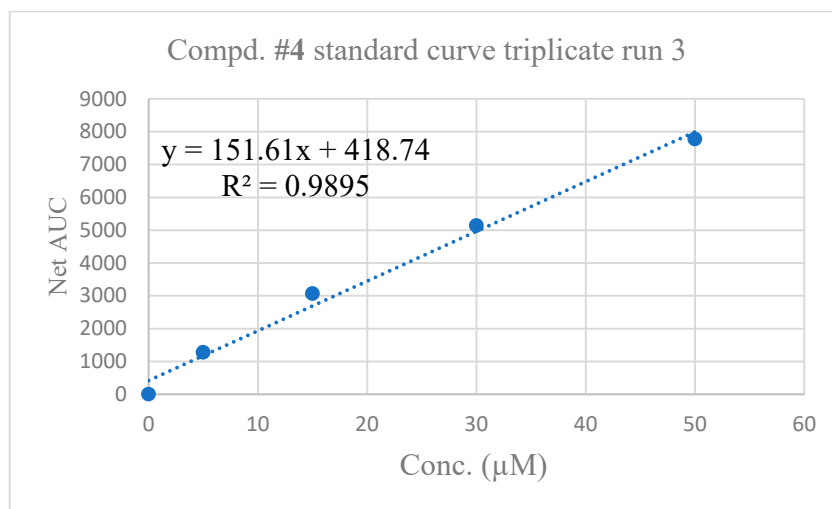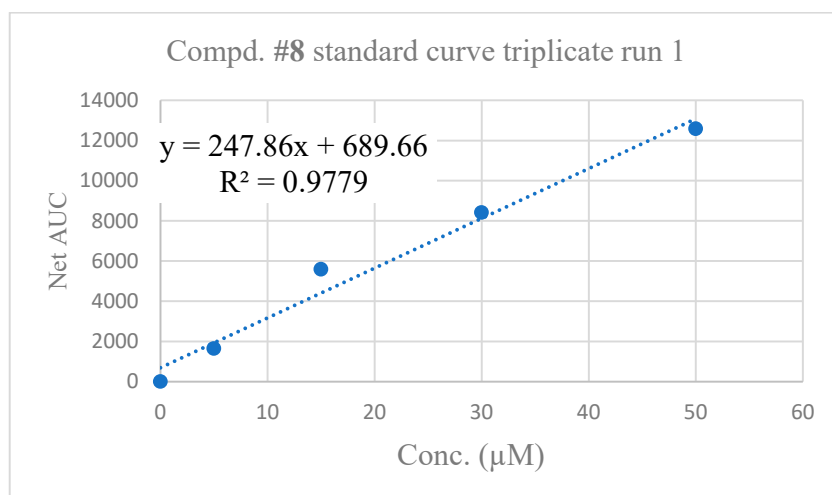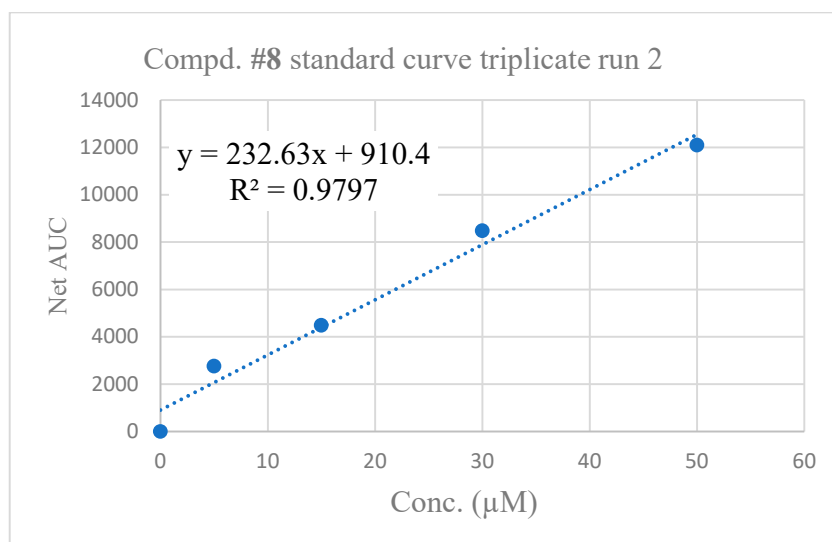

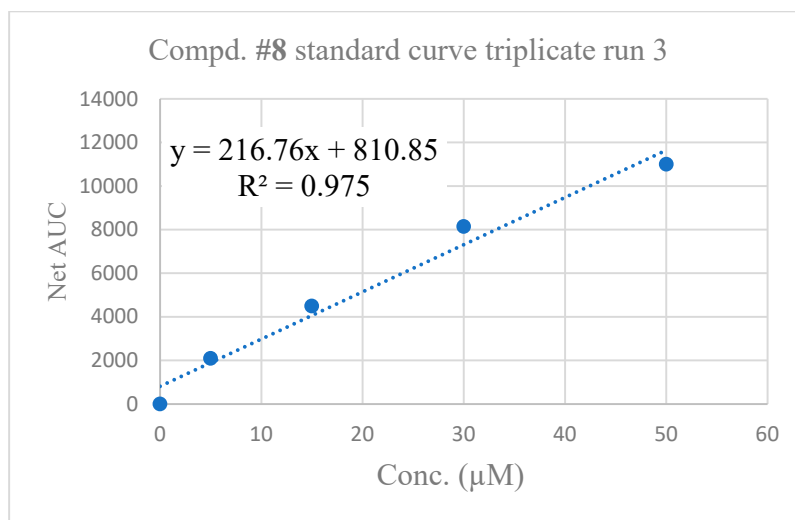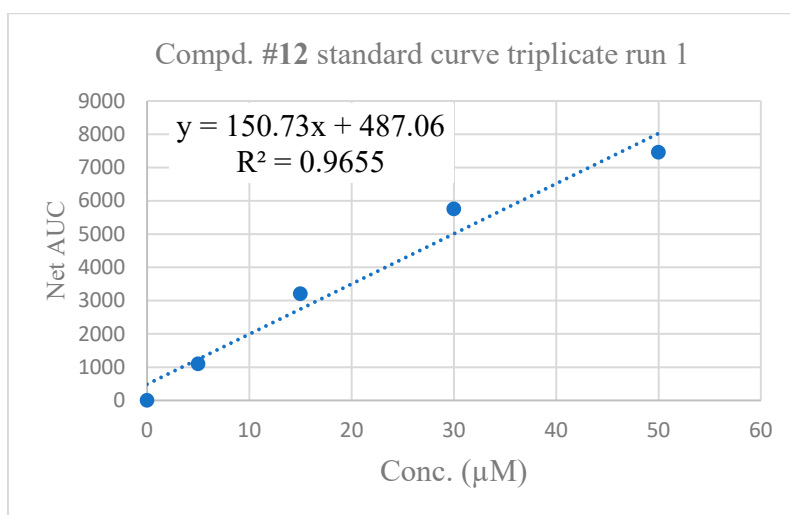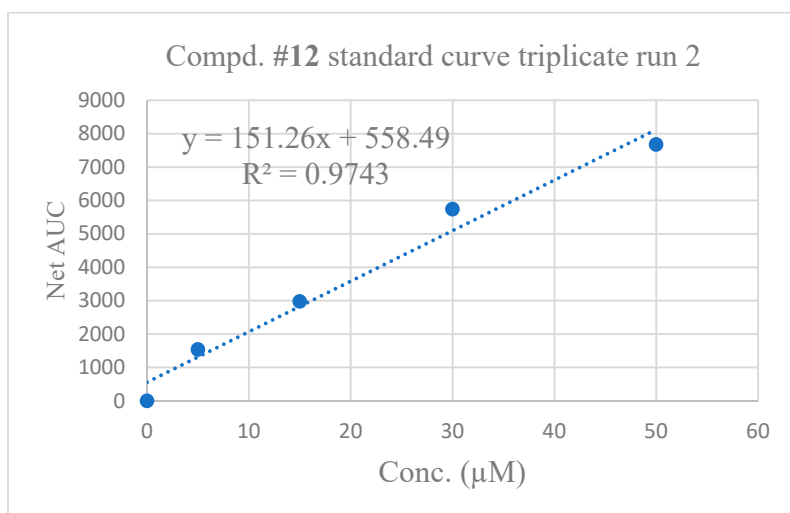

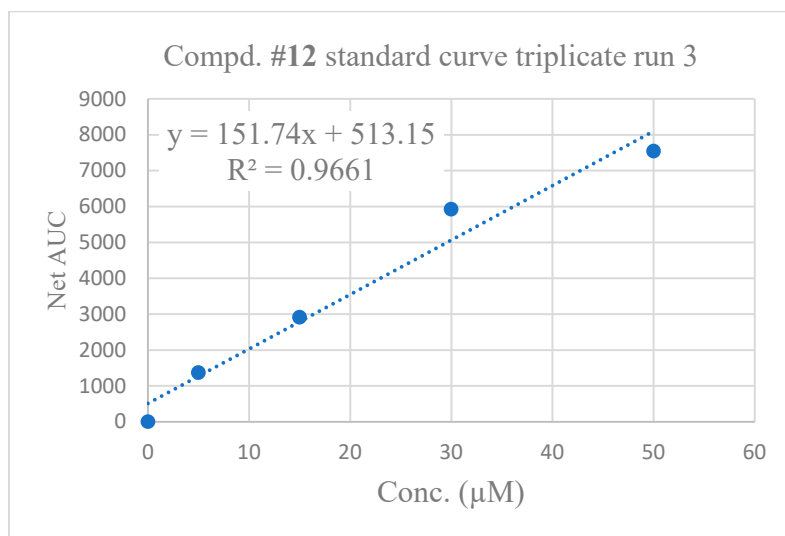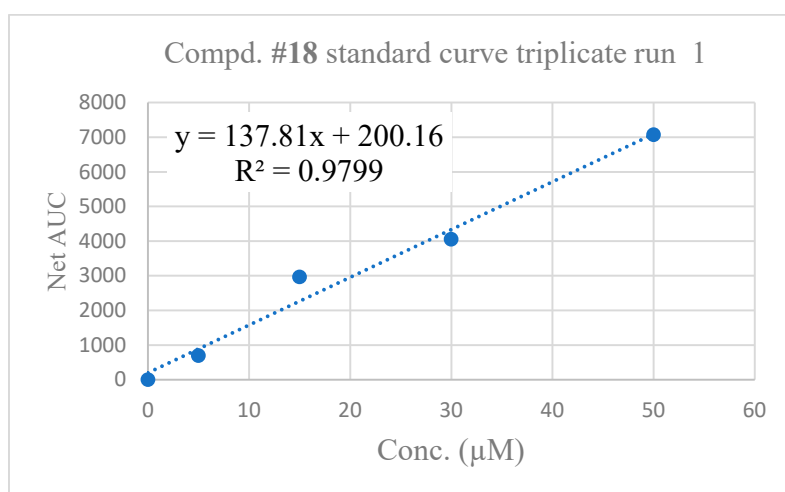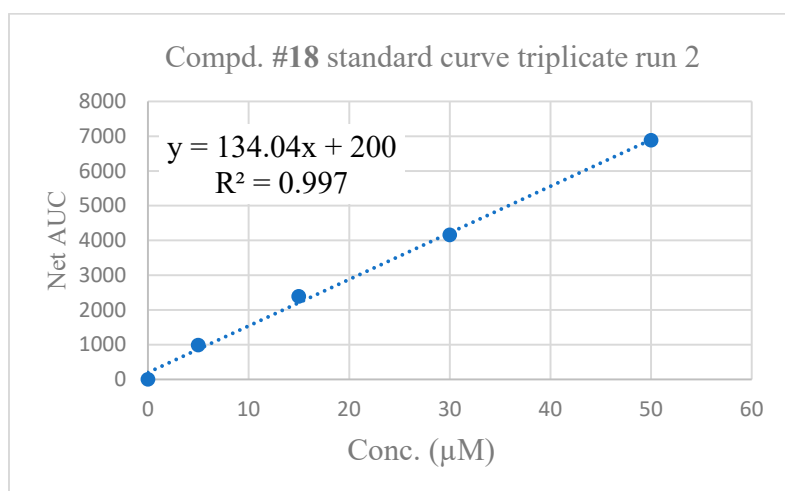

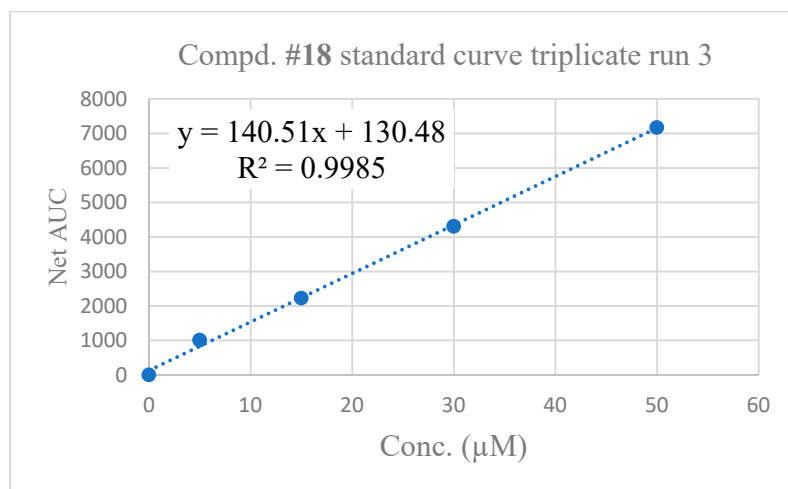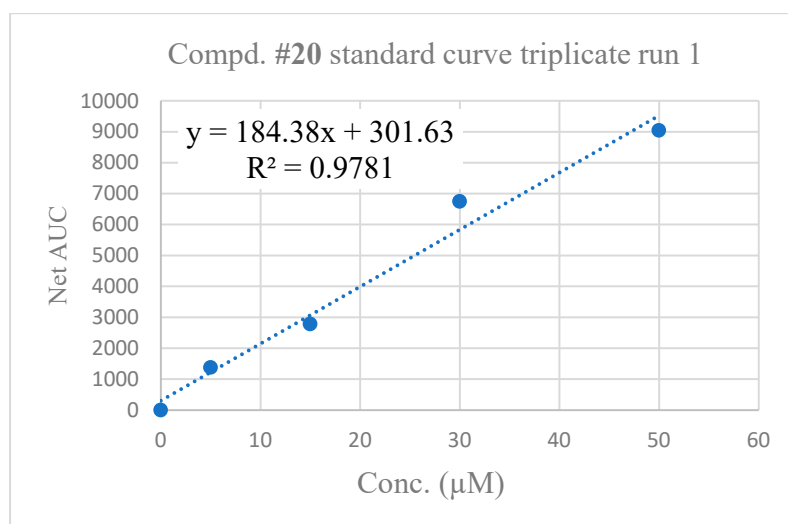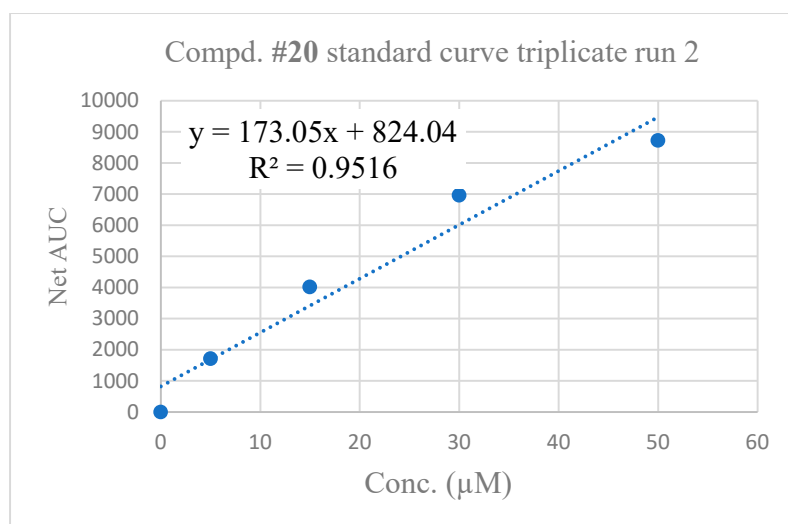

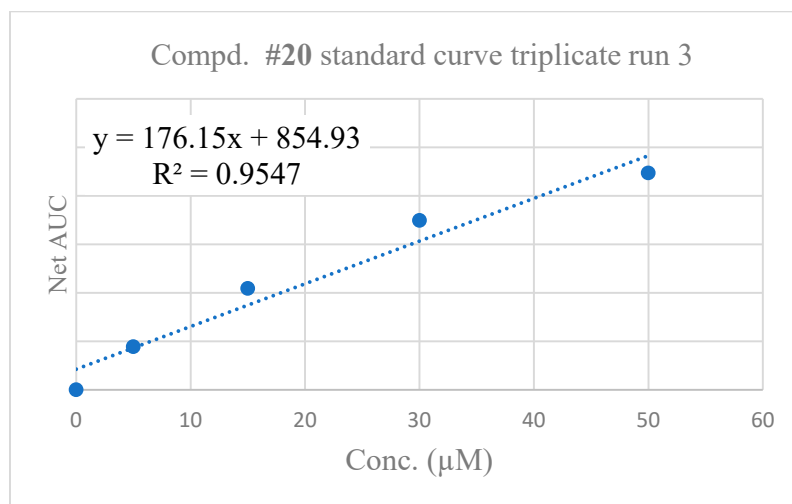

Supplement: s1 [file s1]
