# Supplementary material for: Phenylacetyl-/Trolox- Amides: Synthesis, Sigma-1, HDAC-6, and Antioxidant Activities
Source: MDPI journal article supplement (doi:10.3390/ijms242015295), 2023-10-18

Supplemental  $^1\text{H}$  and  $^{13}\text{C}$  NMR spectra for Compounds 1-20.

Compound #1

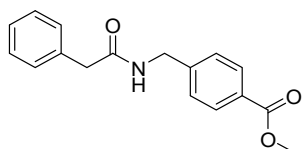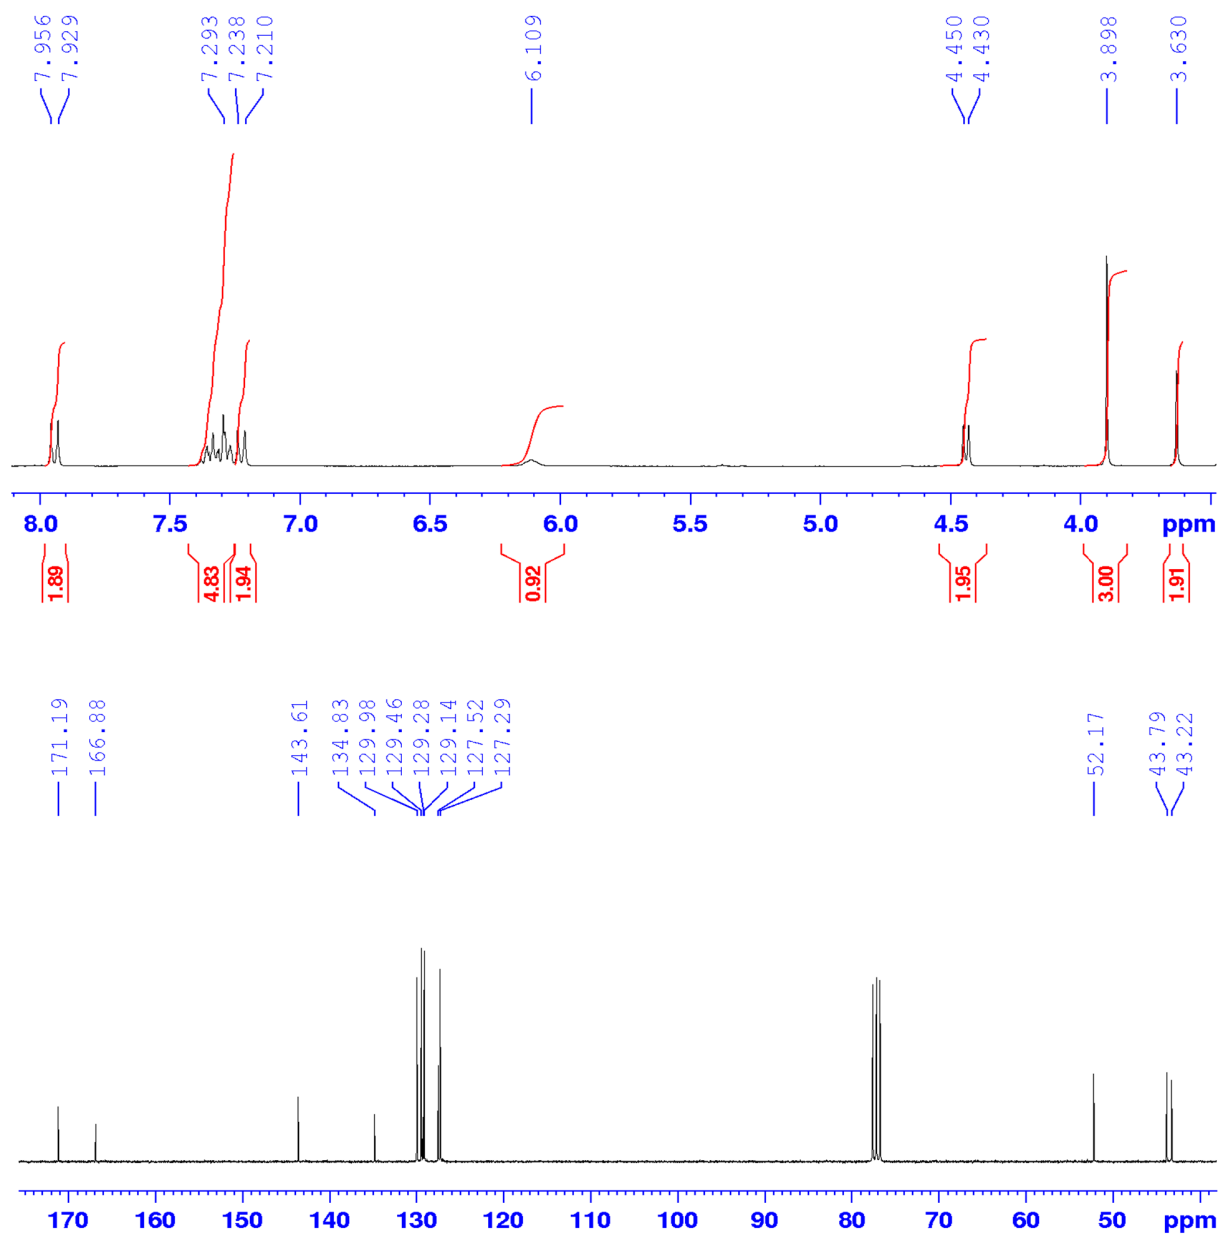

## Compound #2

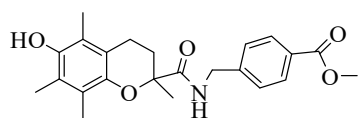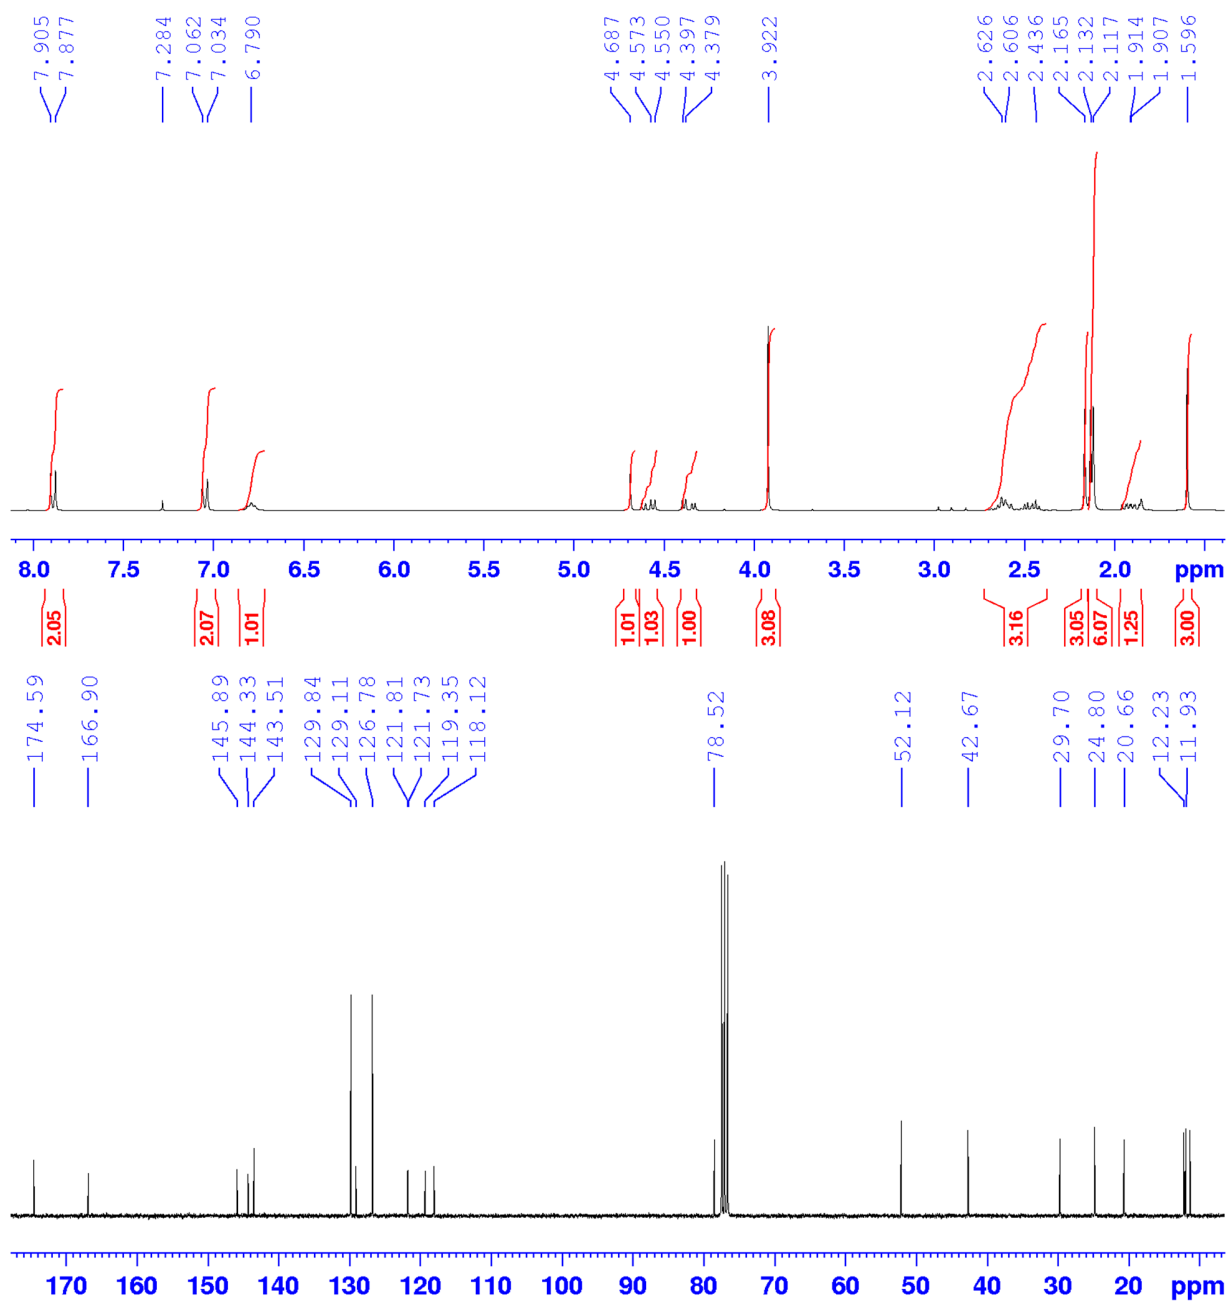

### Compound #3

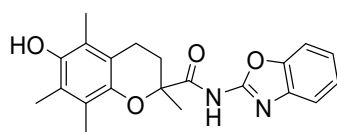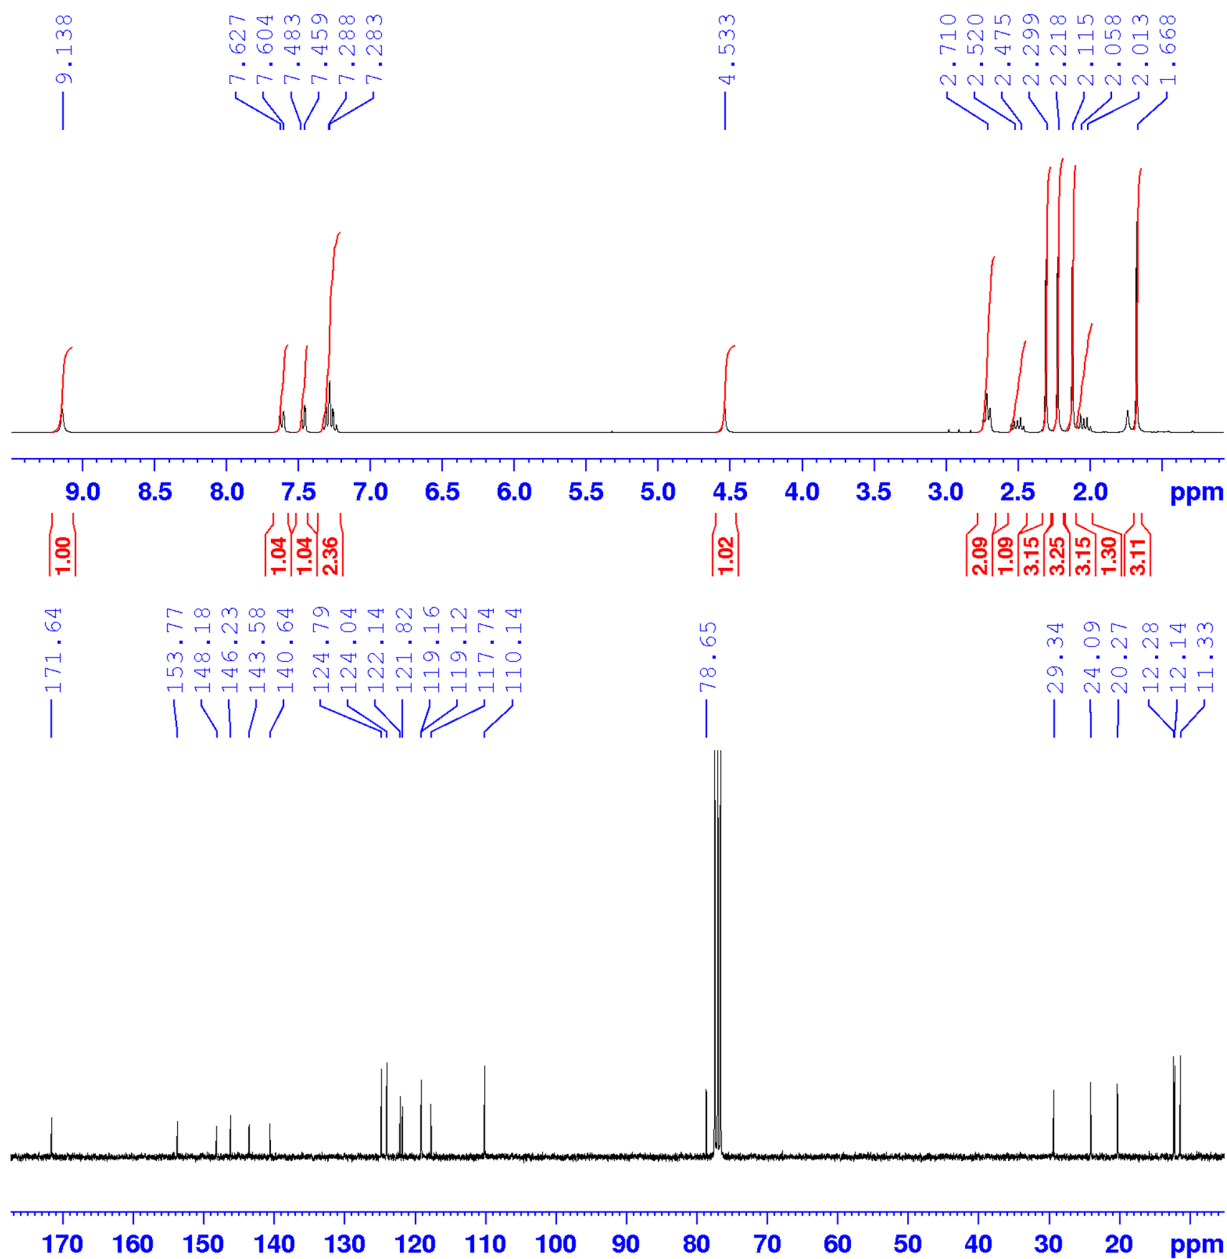

# Compound #4

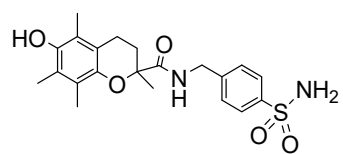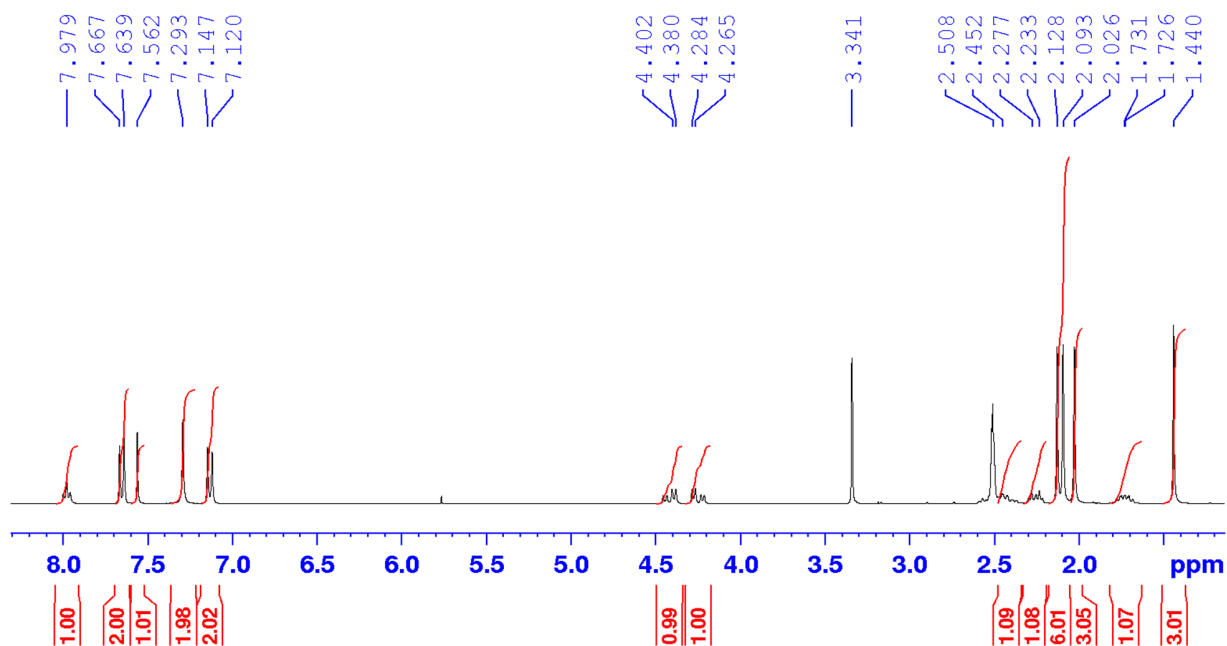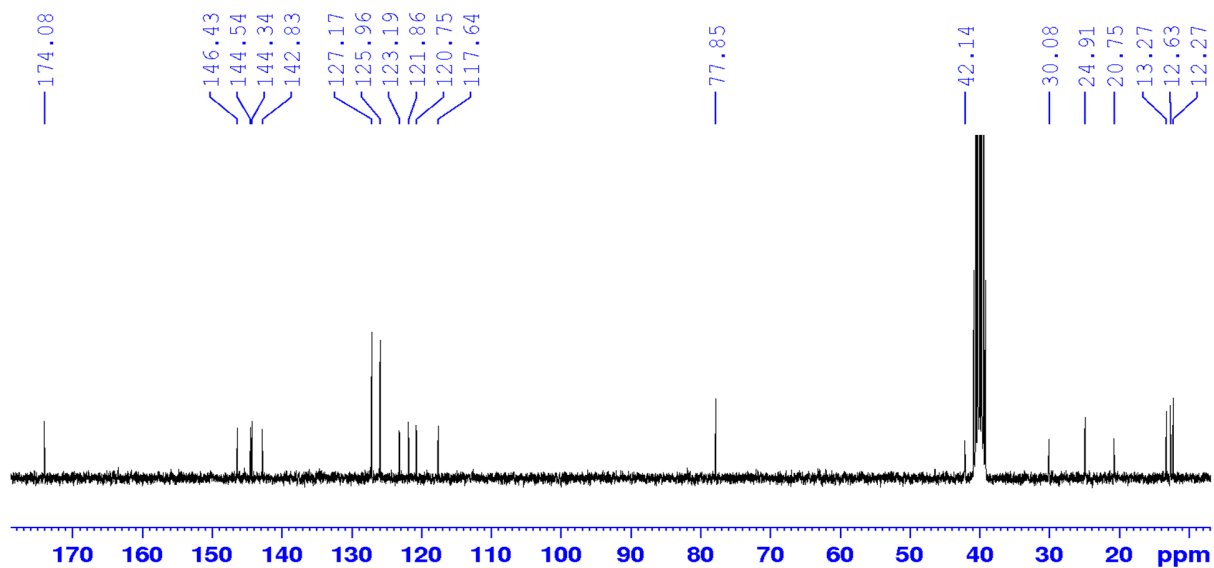

# Compound #5

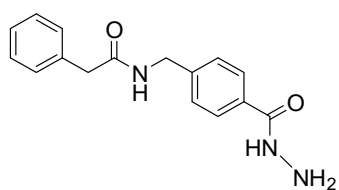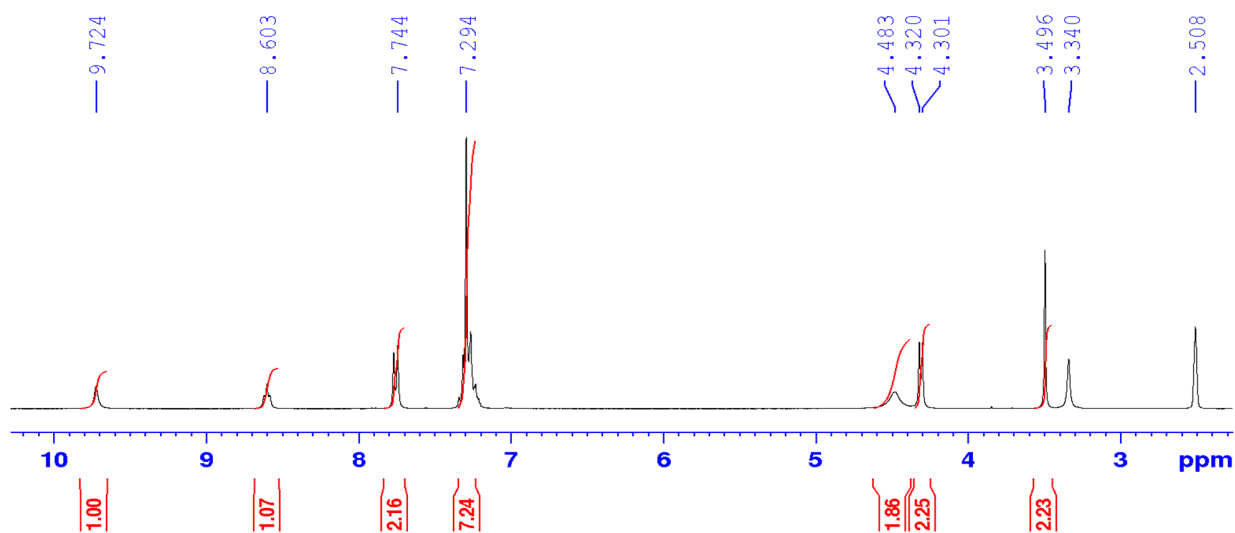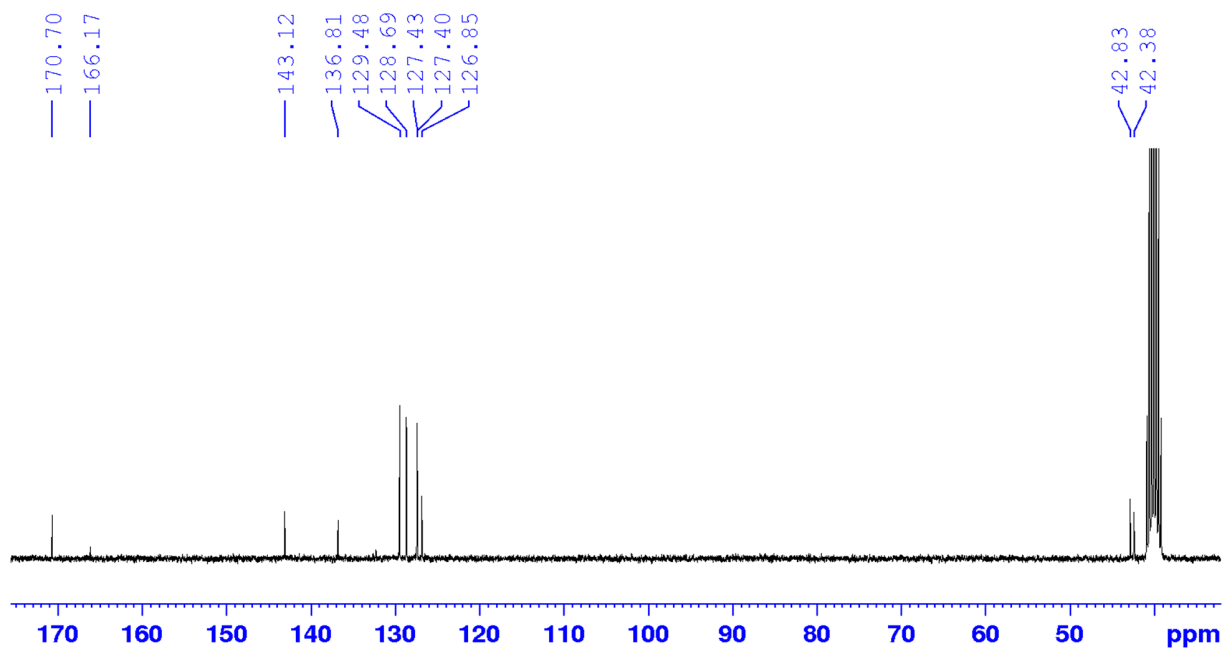

# Compound #6

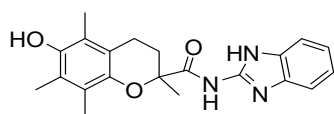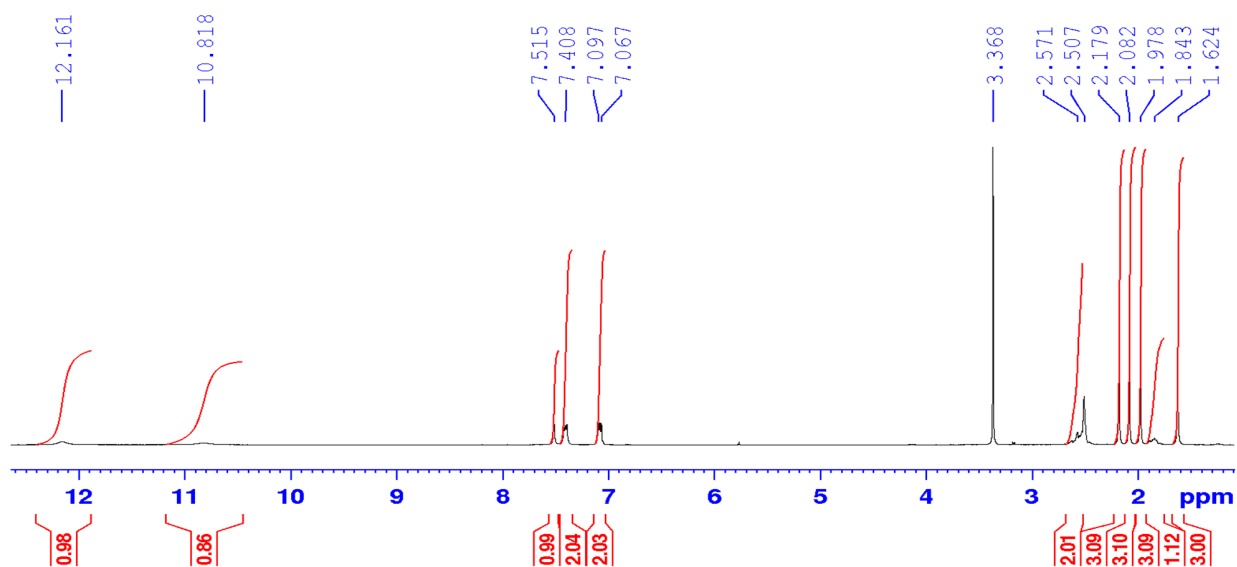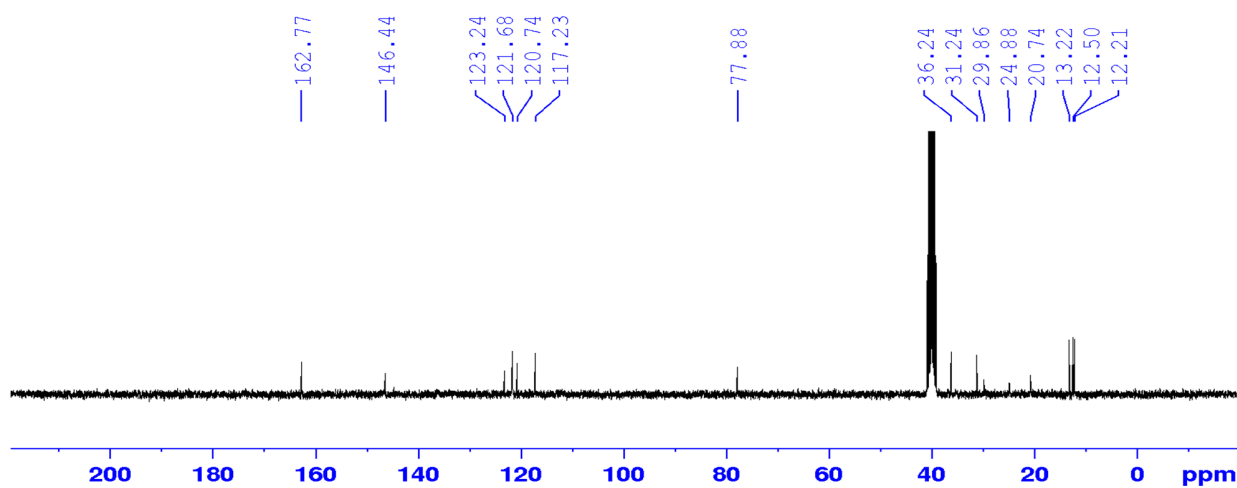

# Compound #7

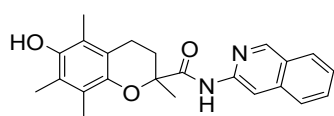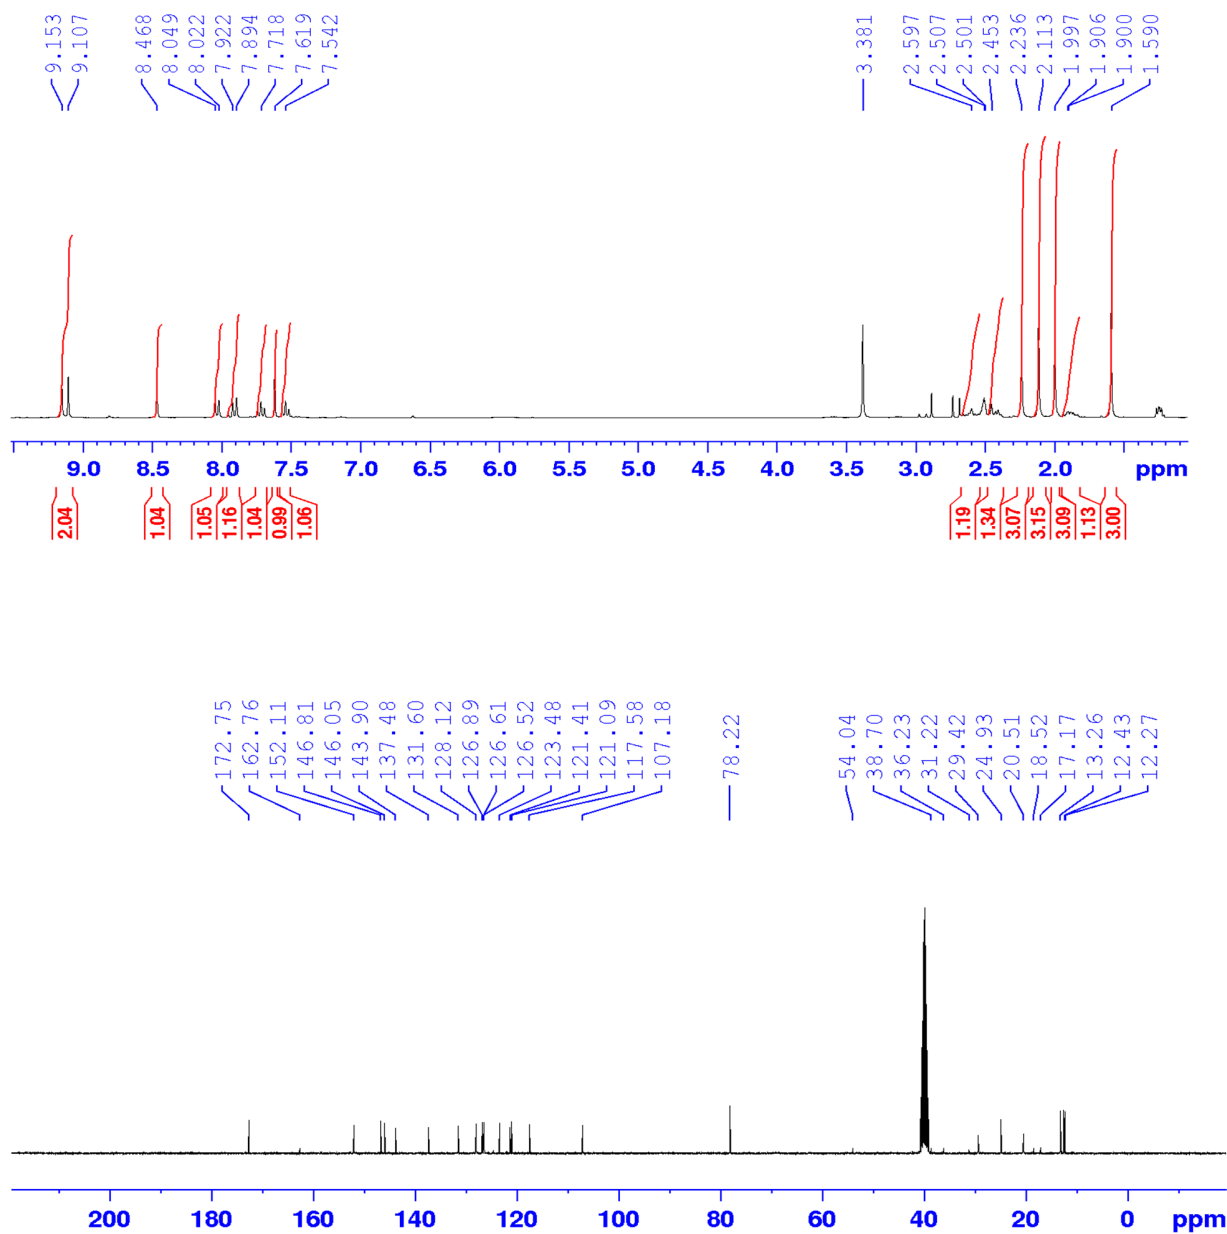

# Compound #8

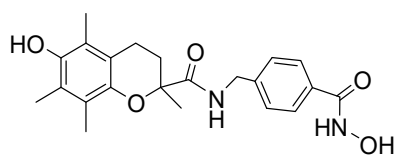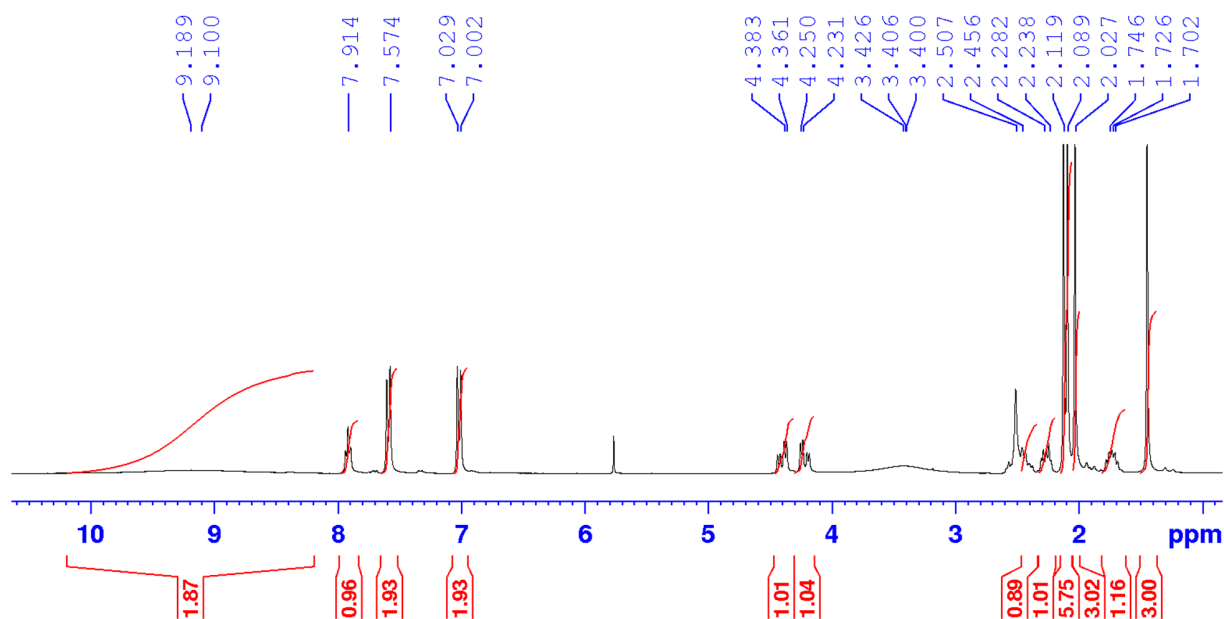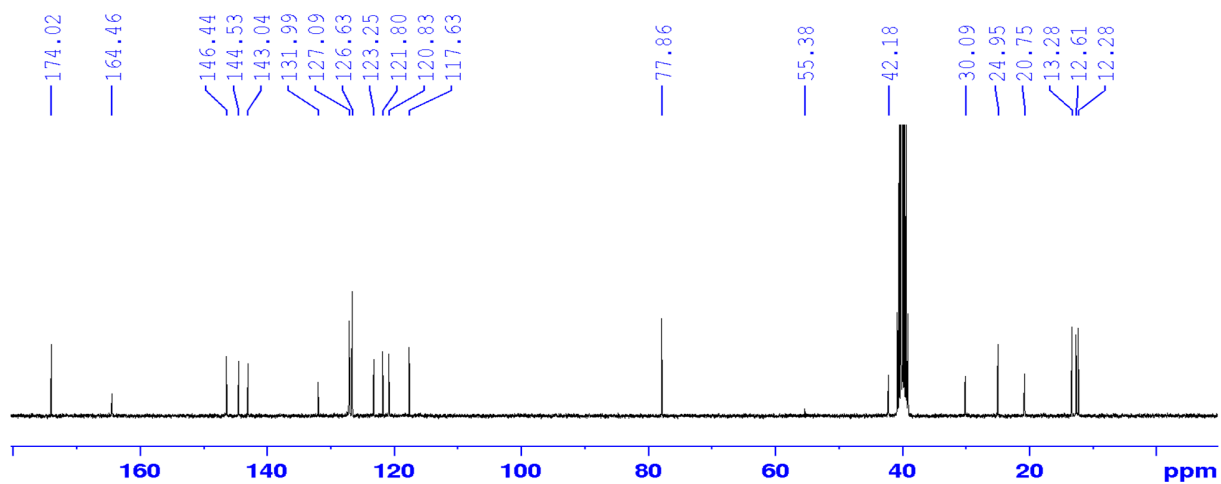



# Compound #9

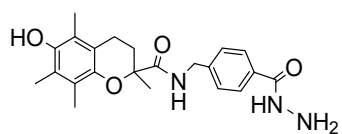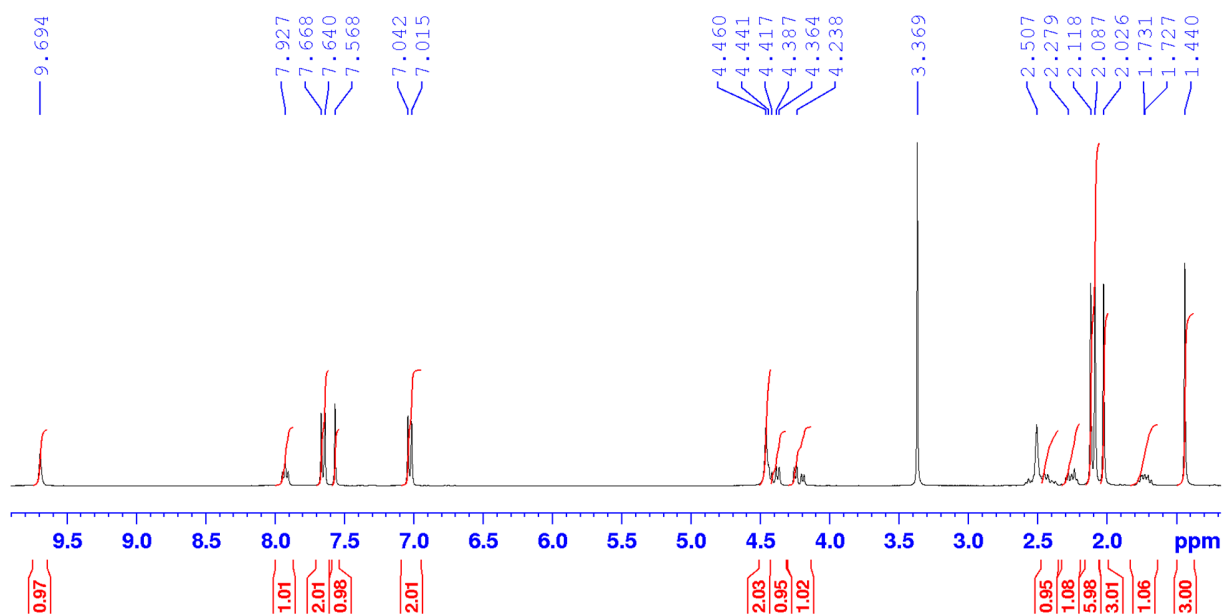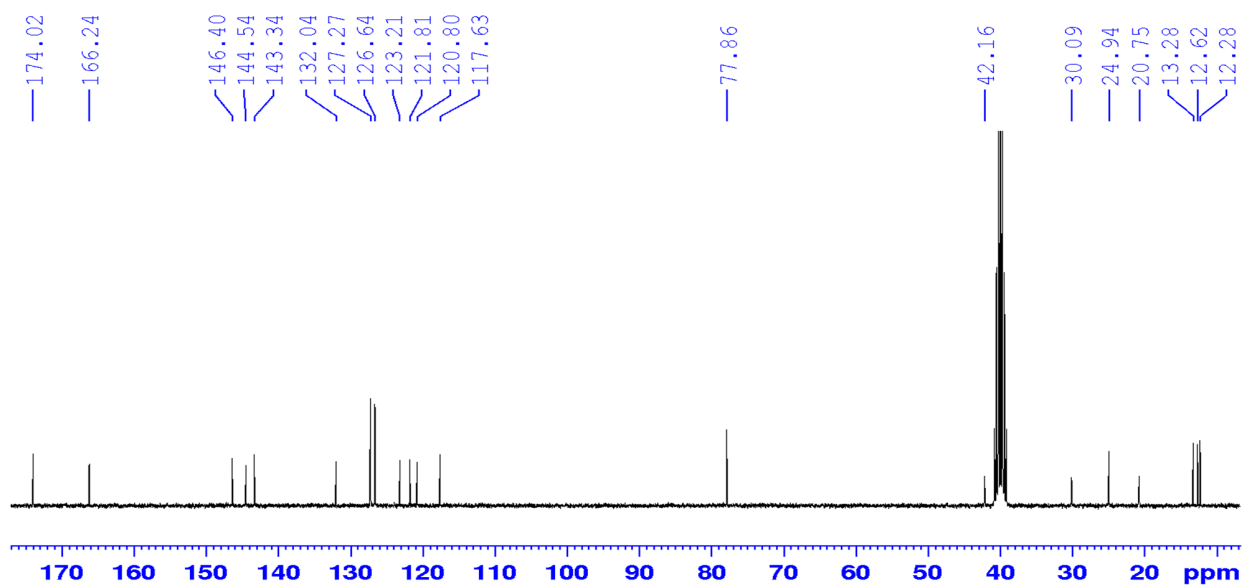

# Compound #10

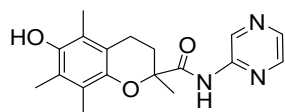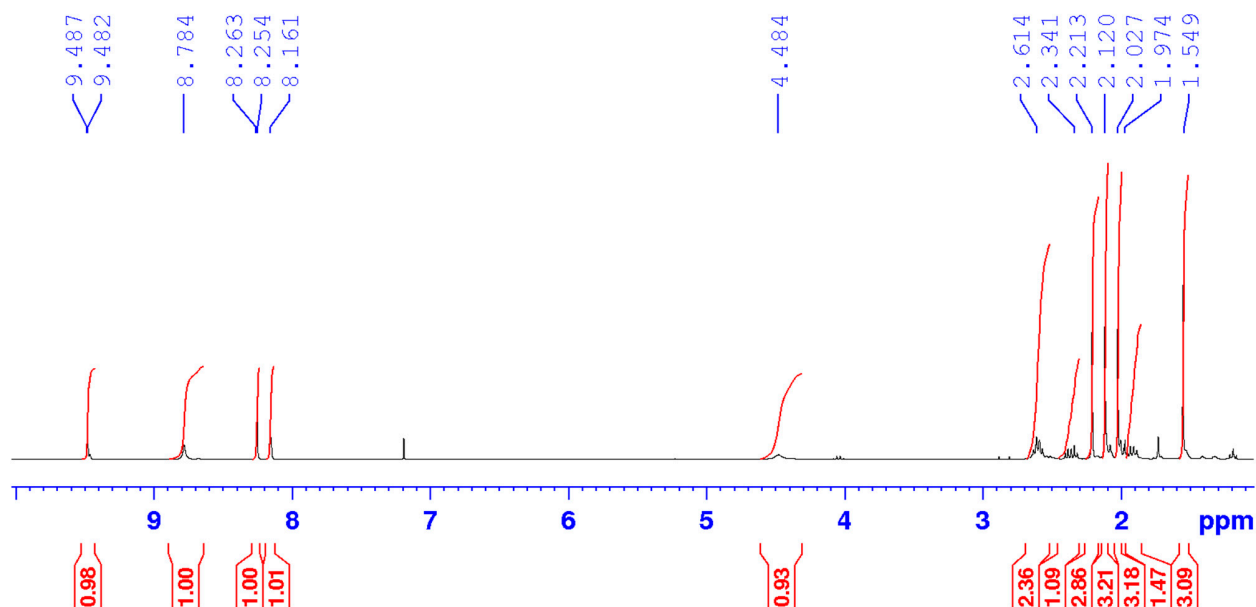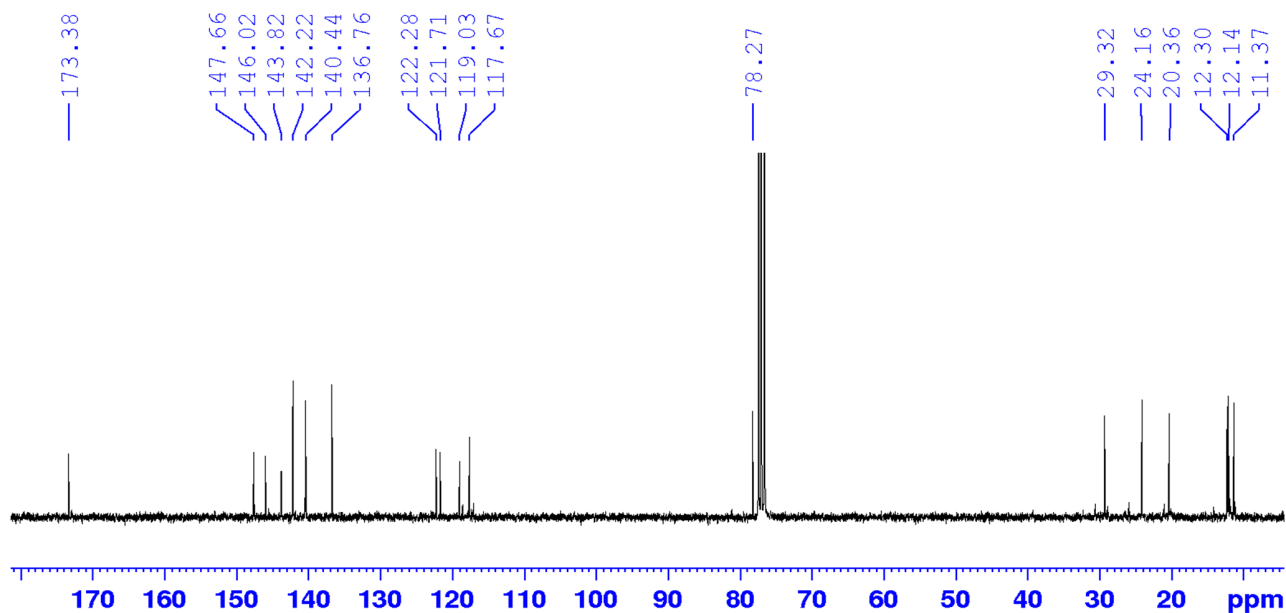

# Compound #11

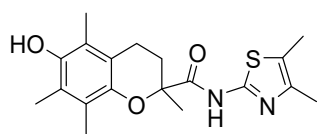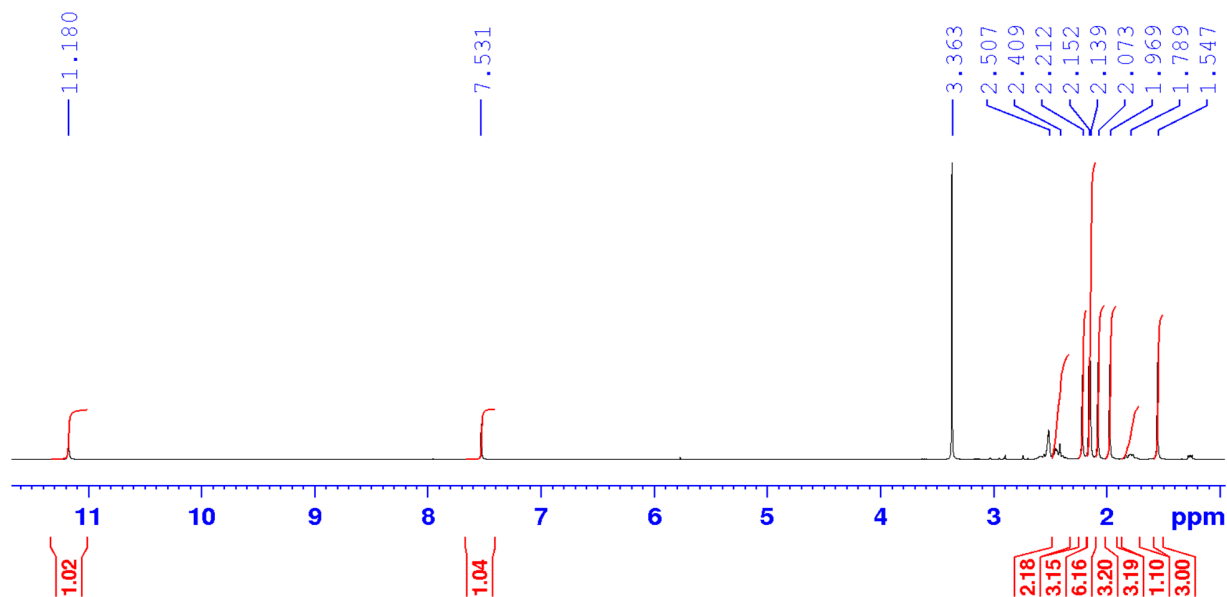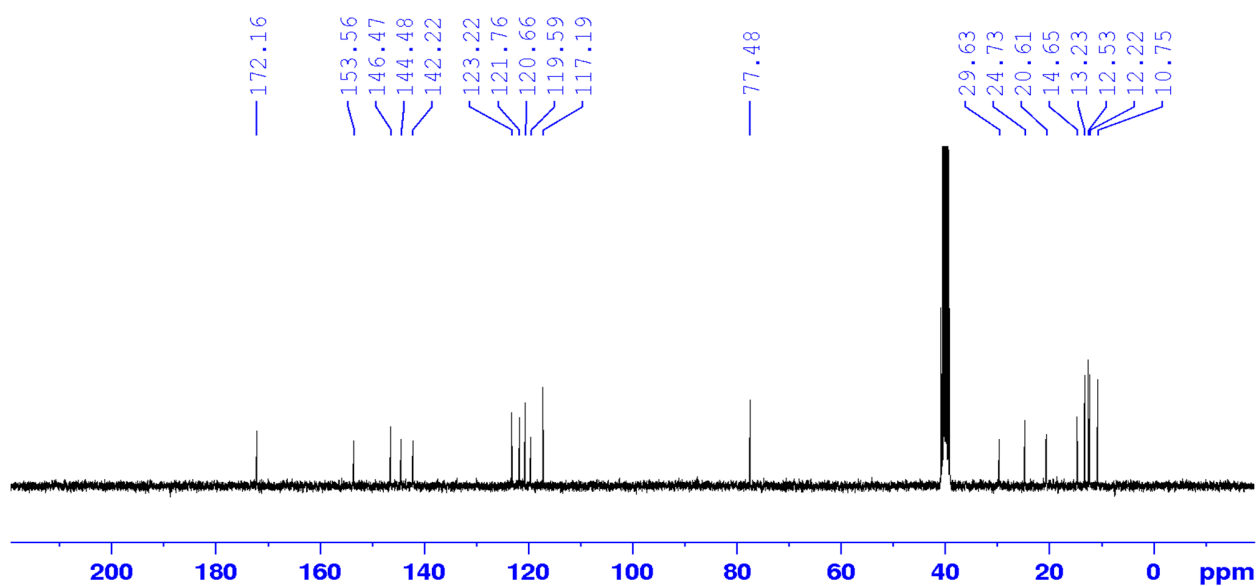

# Compound #12

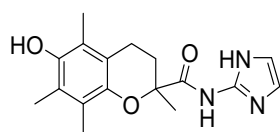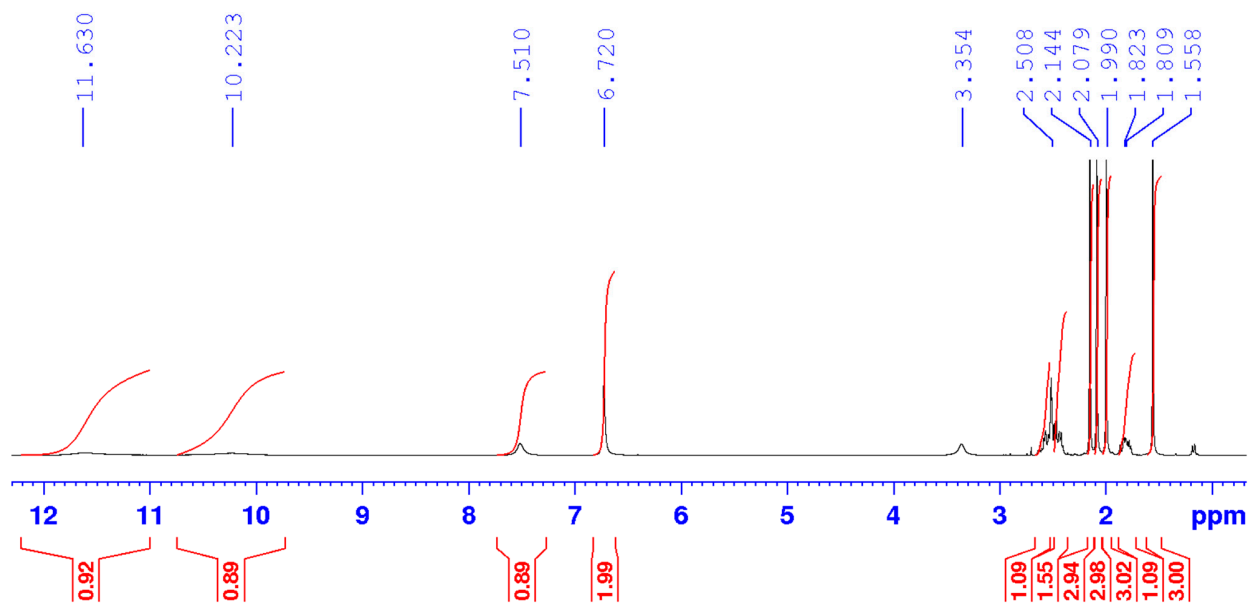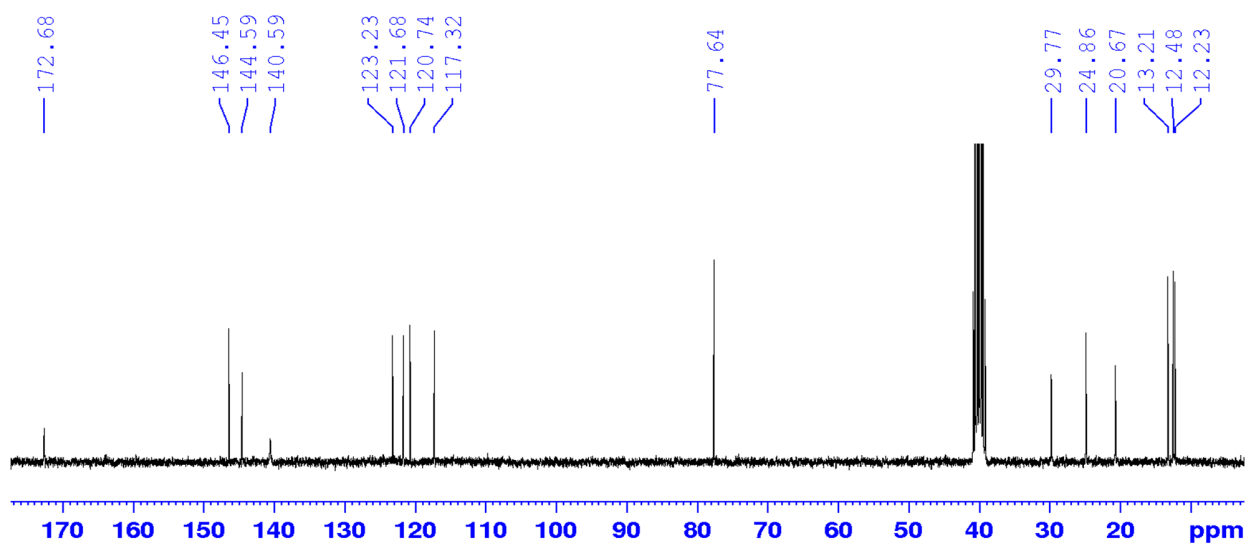

# Compound #13

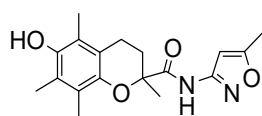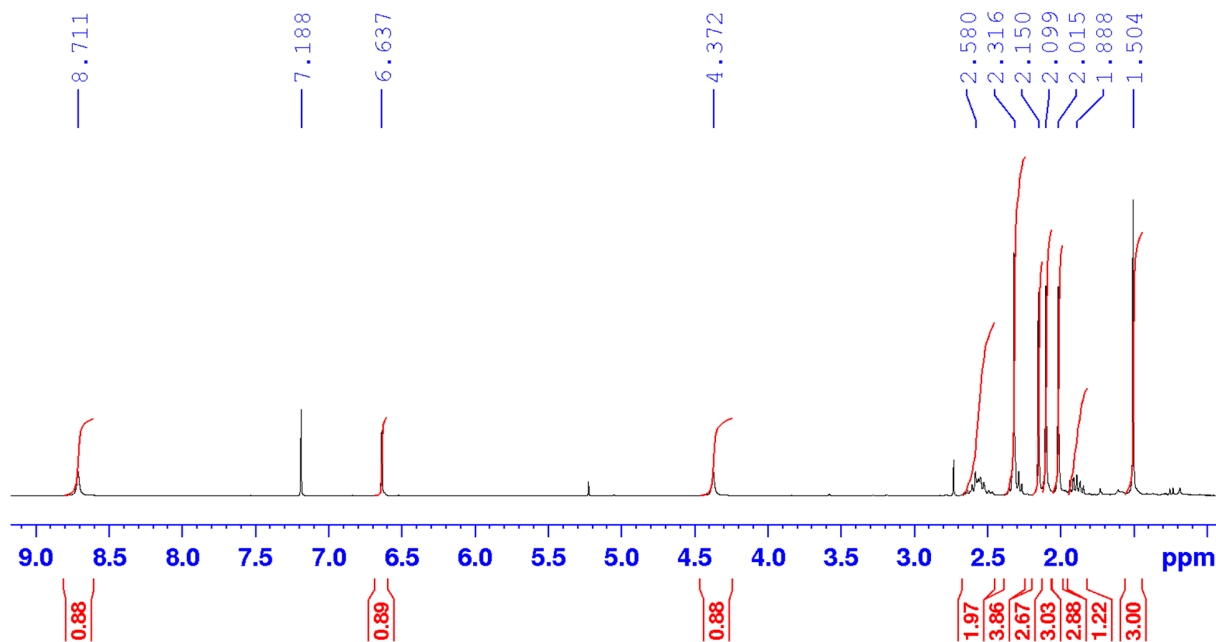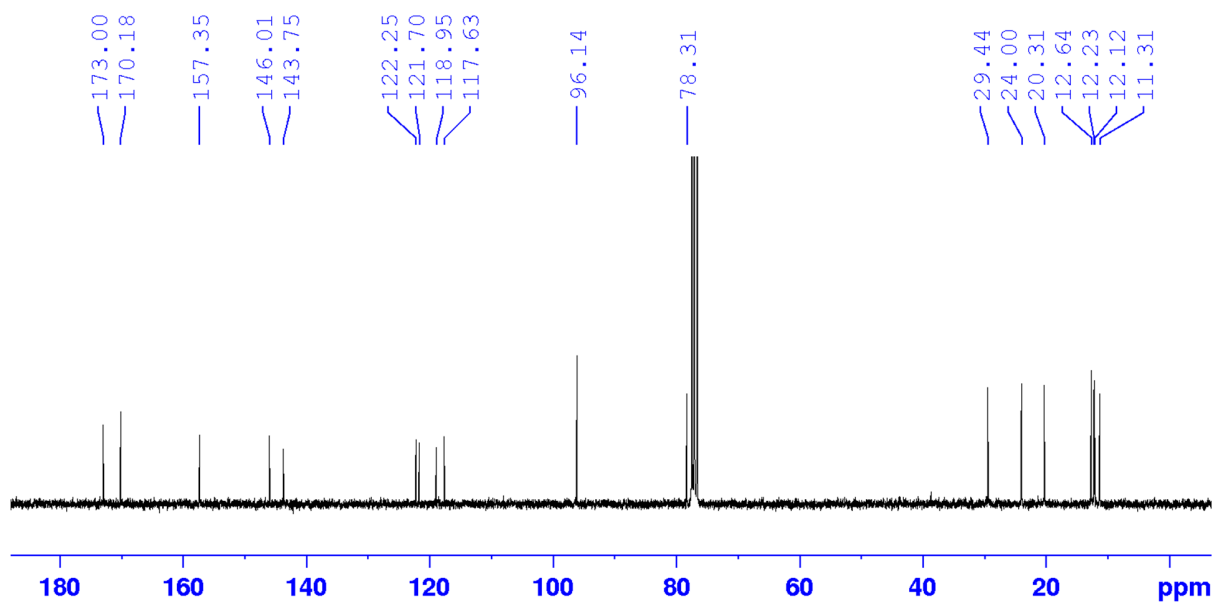

# Compound #14

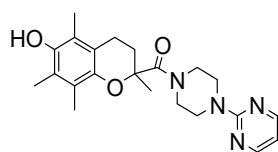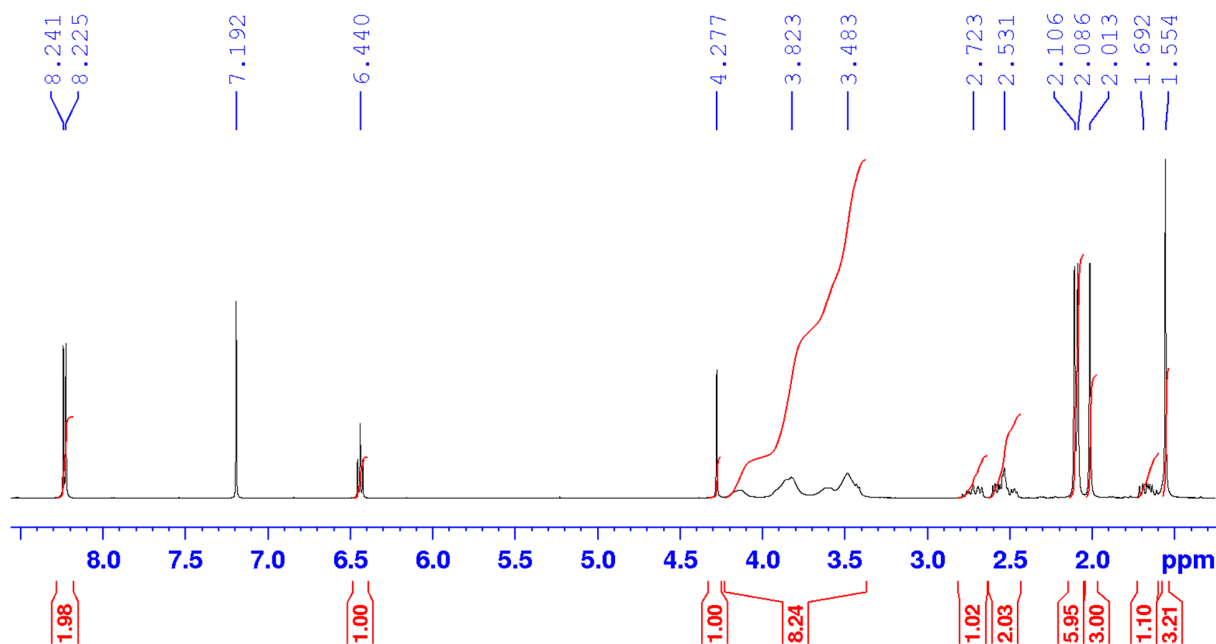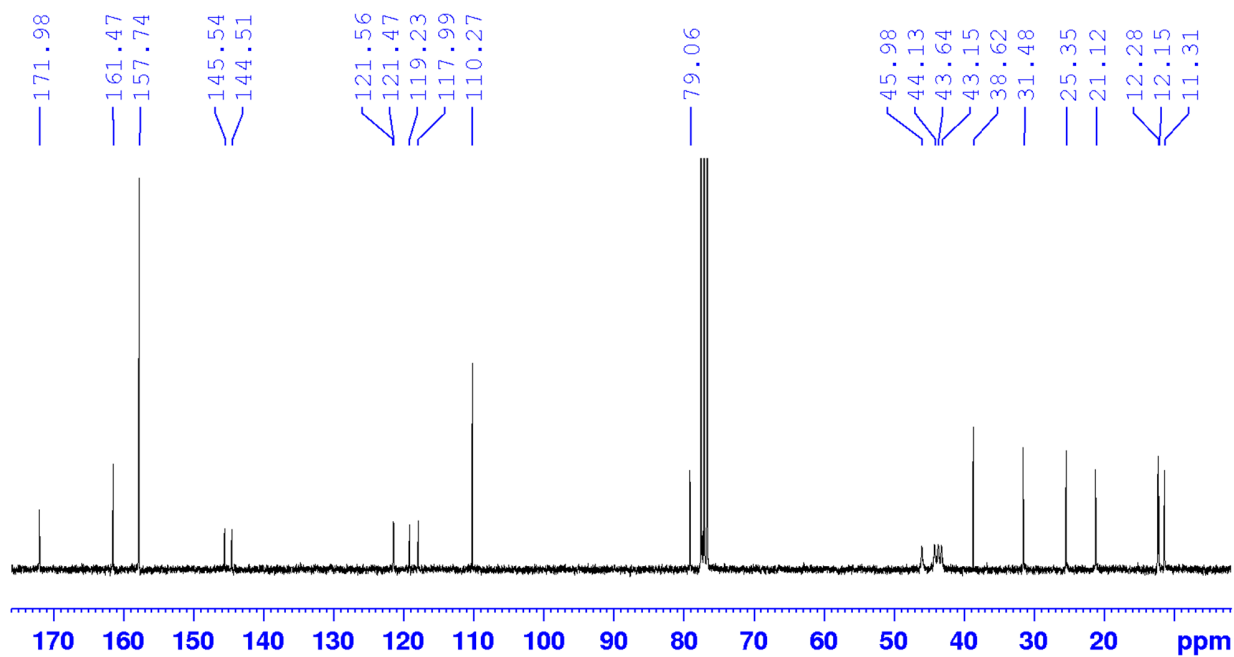

# Compound #15

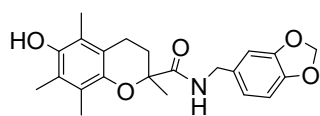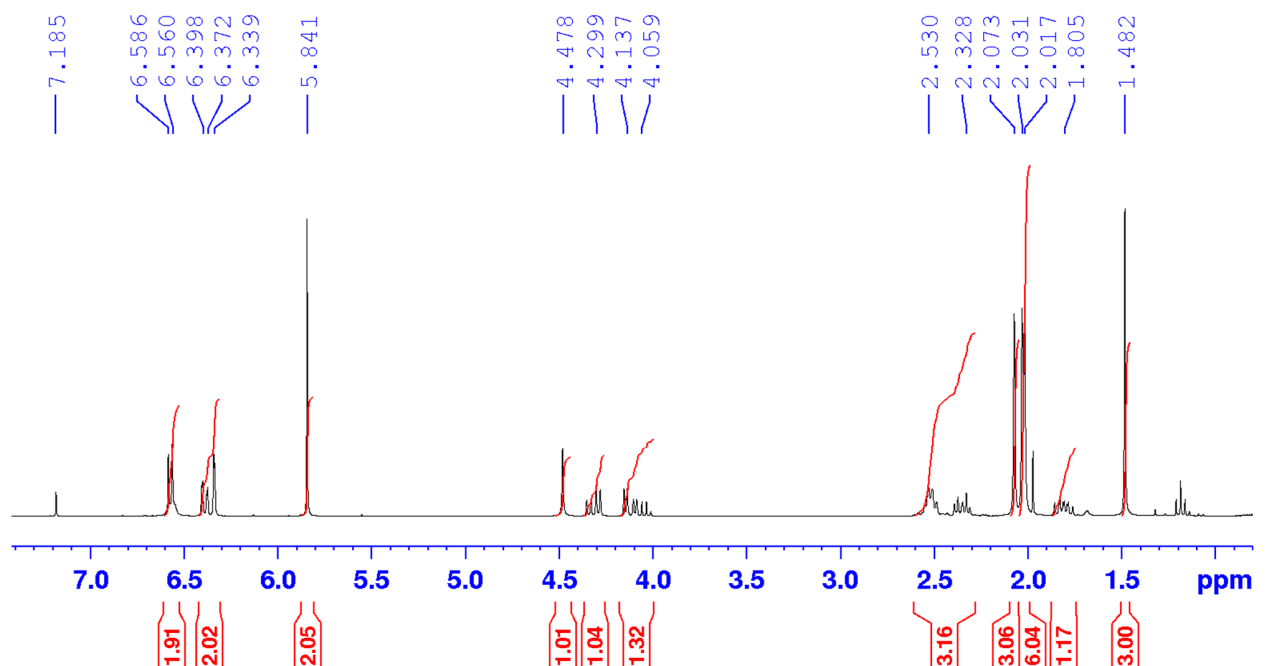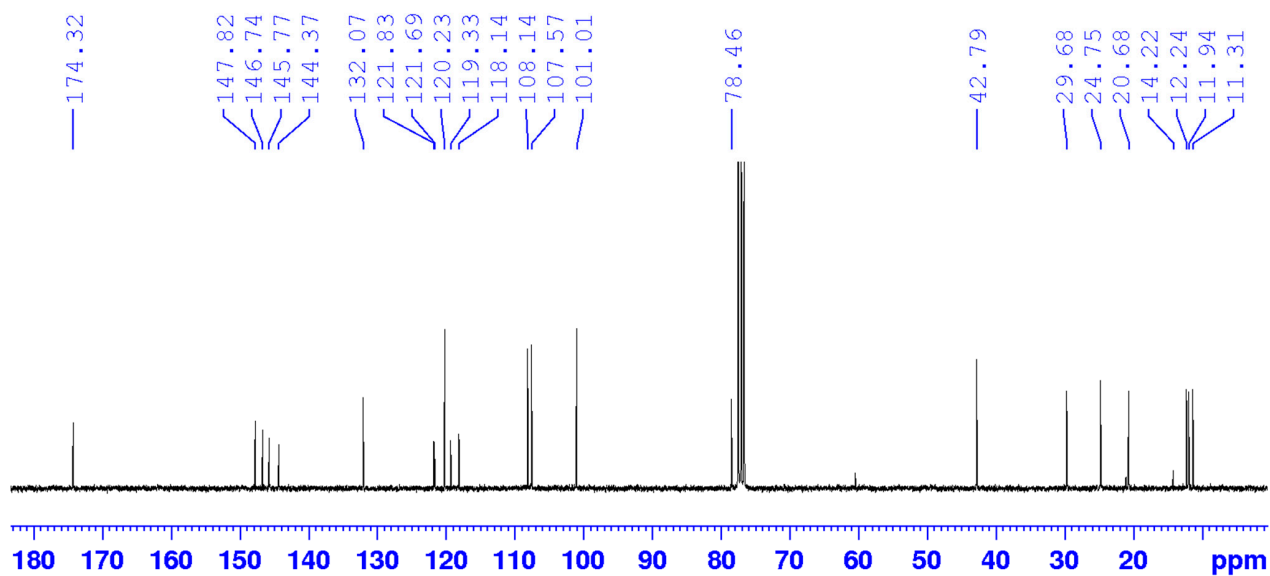

# Compound #16

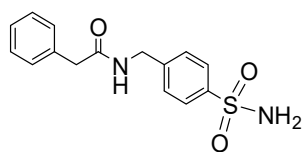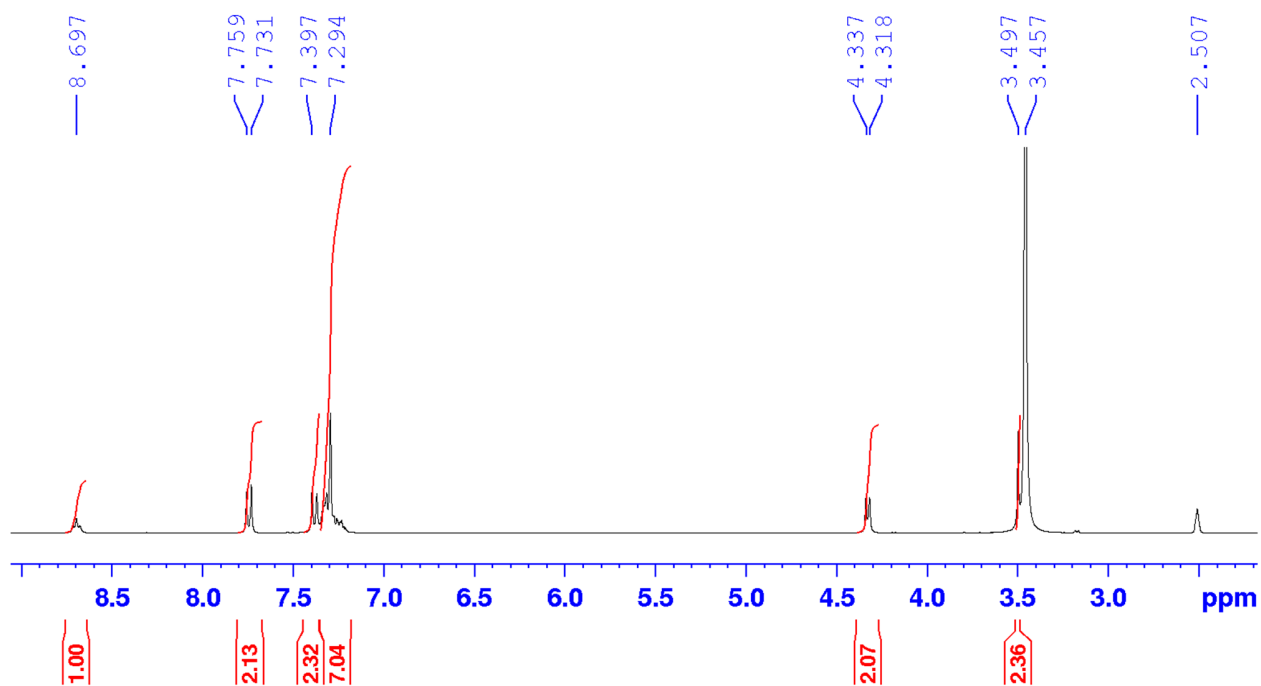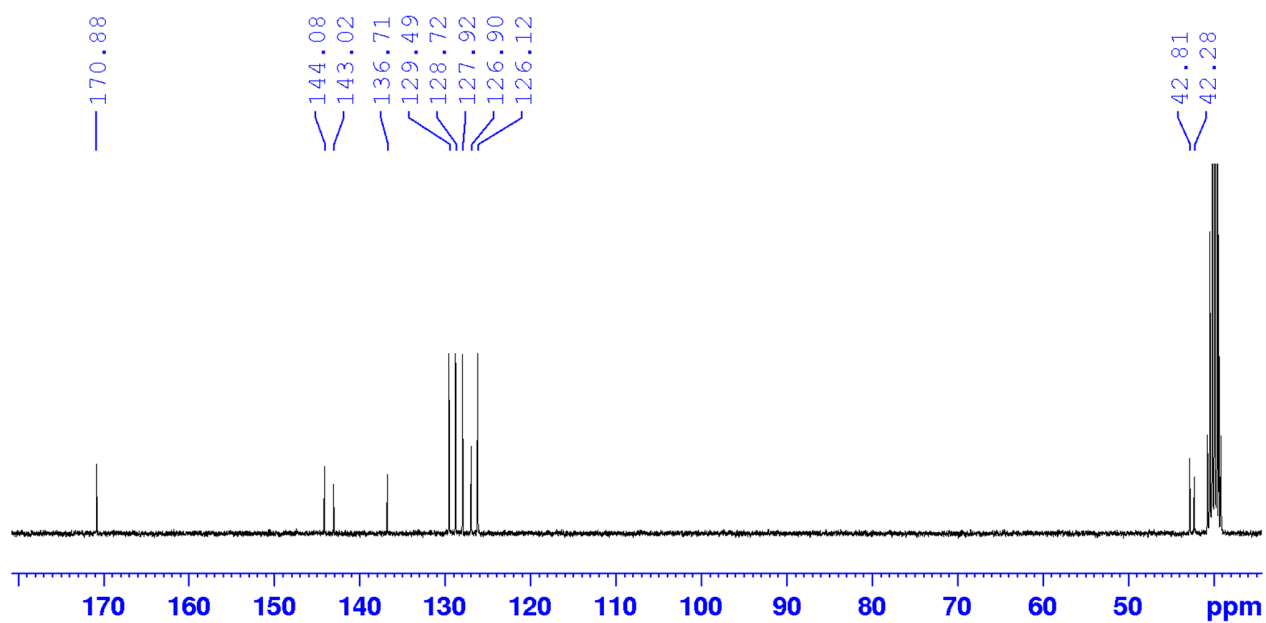



# Compound #17

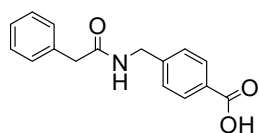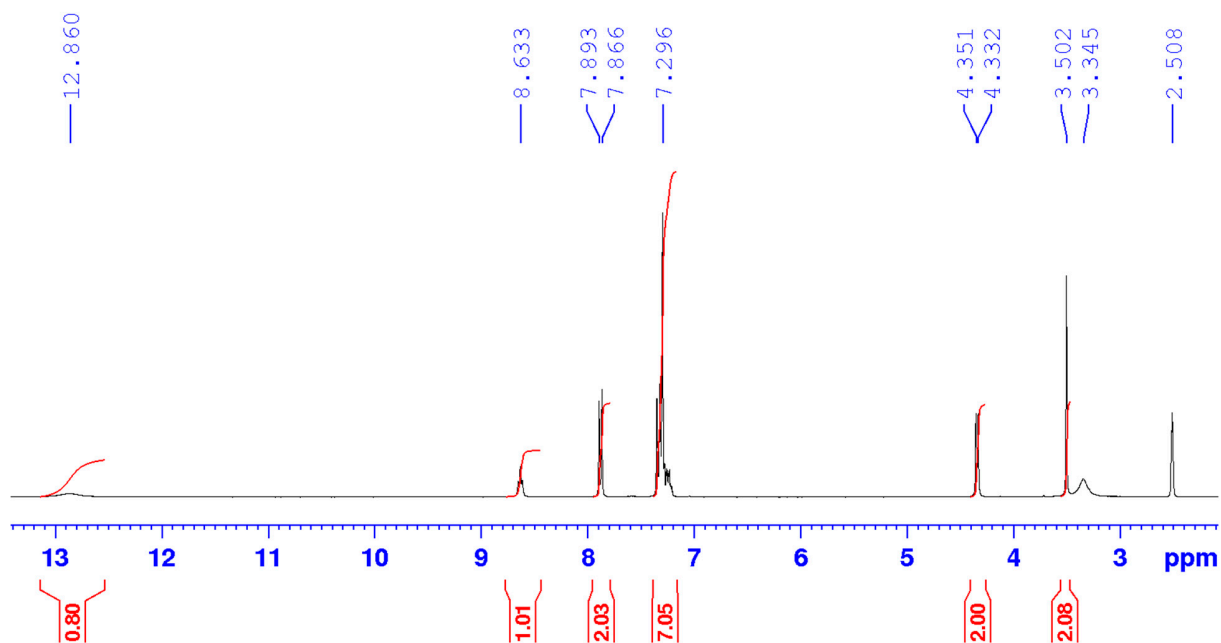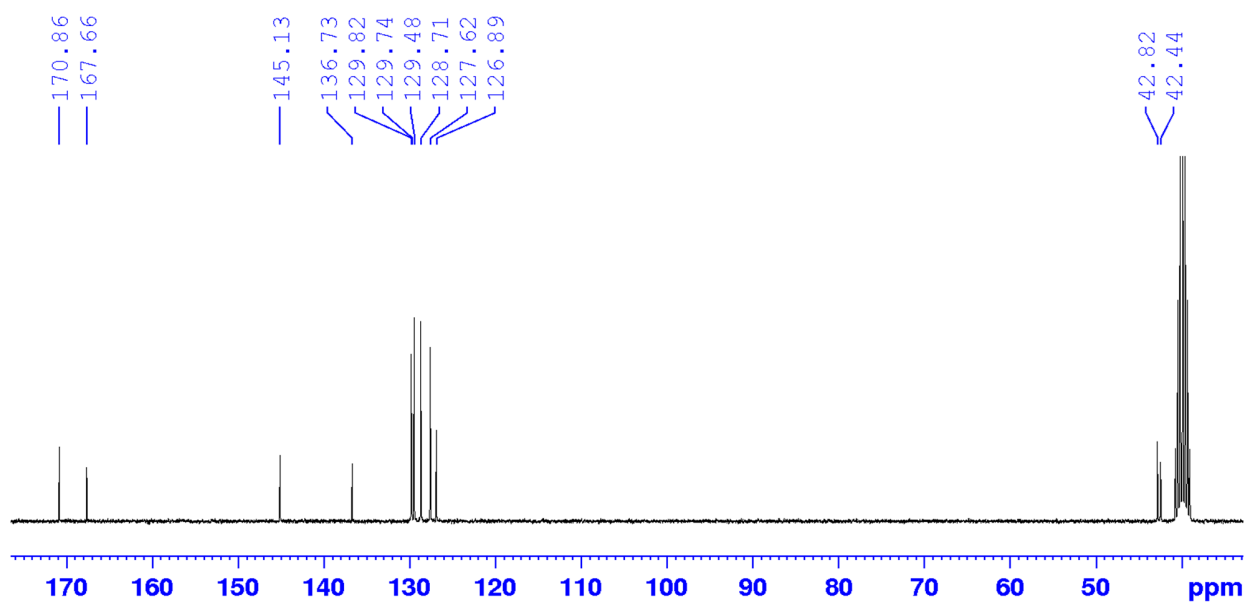

# Compound #18

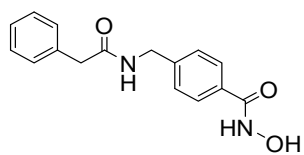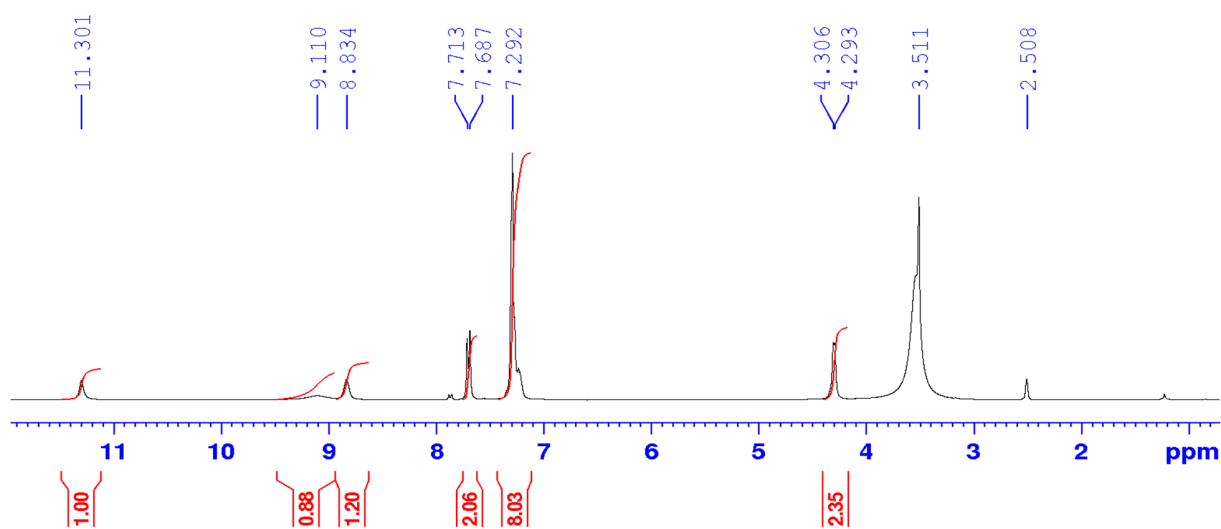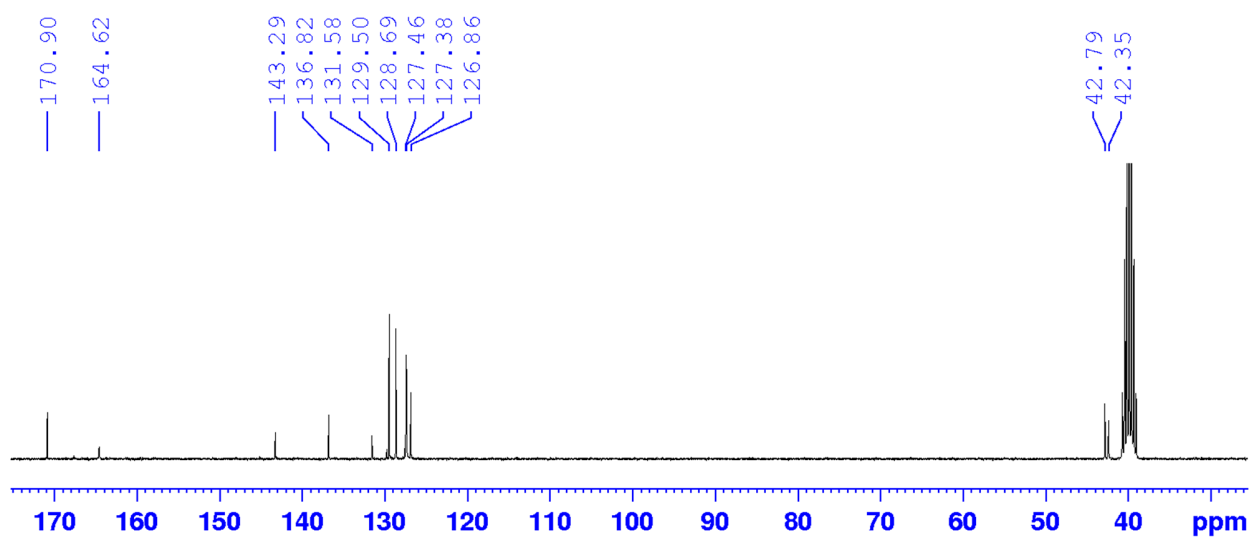

# Compound #19

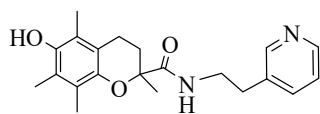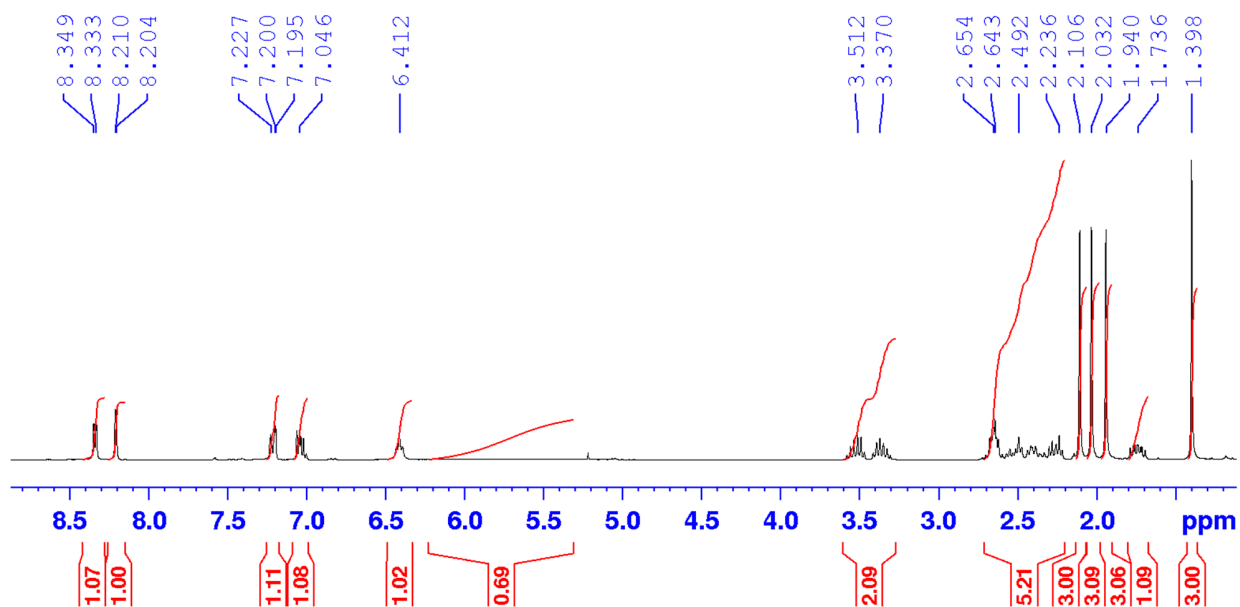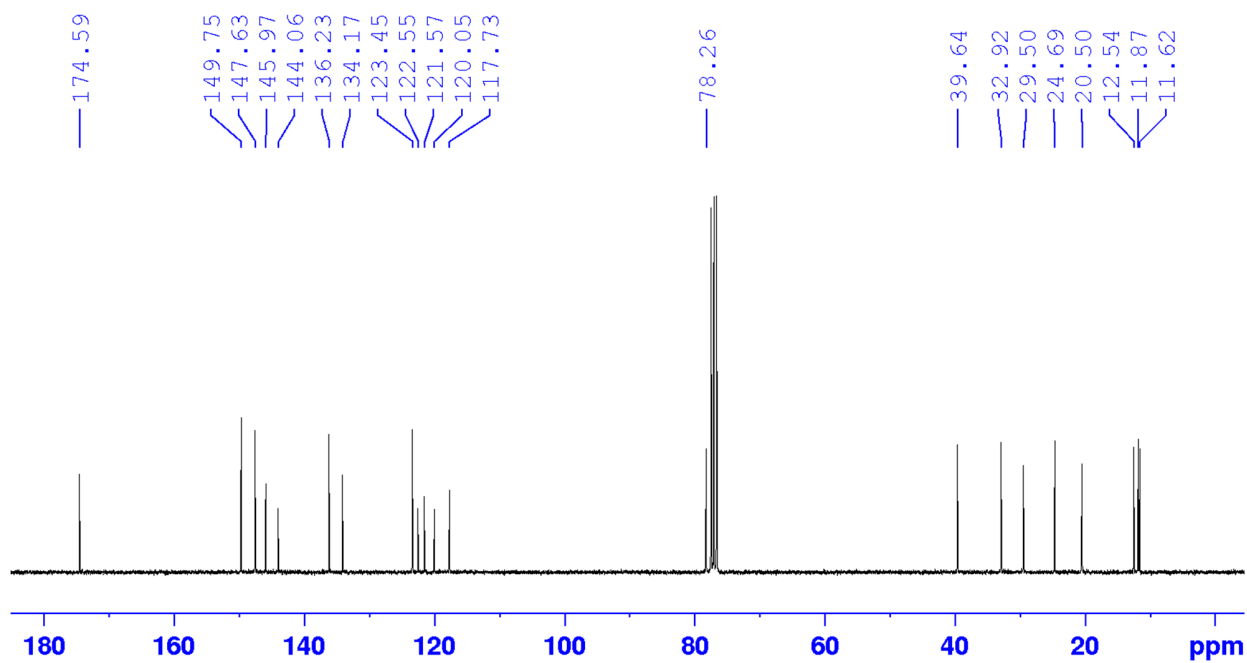

# Compound #20

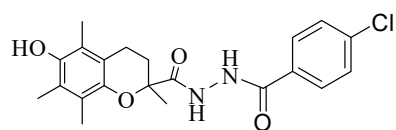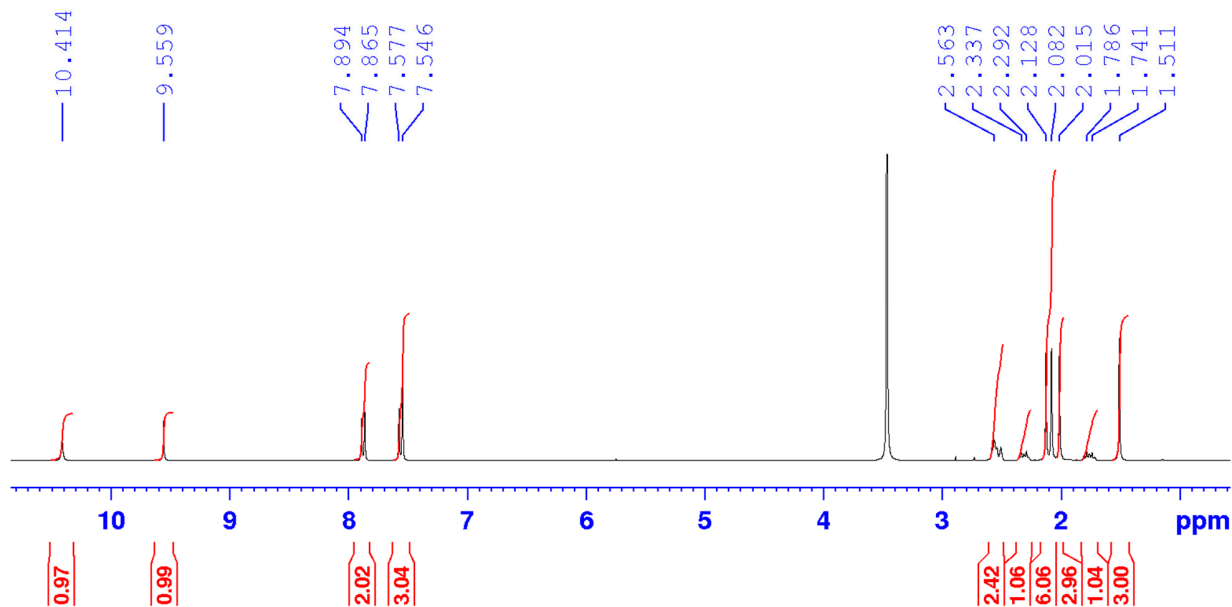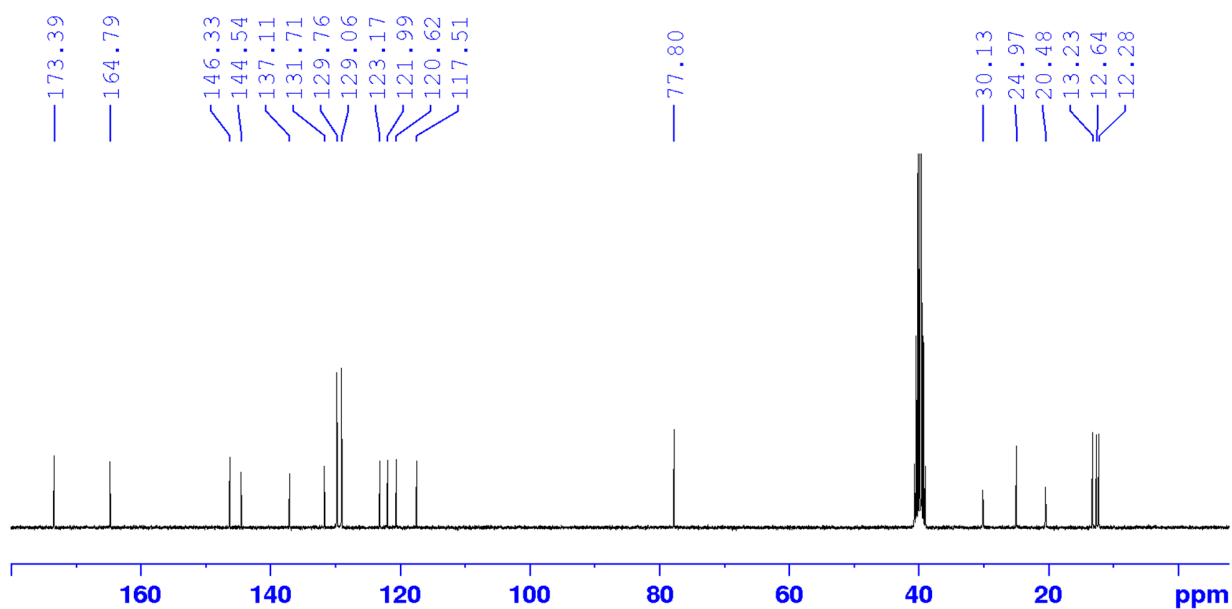

Supplement: s1 [file s1]
